# Supplementary material for: Online Resources for People Who Self-Harm and Those Involved in Their Informal and Formal Care: Observational Study with Content Analysis
Source: MDPI journal article supplement (doi:10.3390/ijerph17103532), 2020-05-18
Supplement: s1 [file s1]

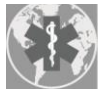

**Supplementary A.** The 49 Websites identified by the scoping work.

| #  | Website Name/Organisation                                         | Link                                                                                                                                              |
|----|-------------------------------------------------------------------|---------------------------------------------------------------------------------------------------------------------------------------------------|
| 1  | National Institute for Health and Care Excellence                 | <a href="https://www.nice.org.uk/">https://www.nice.org.uk/</a>                                                                                   |
| 2  | British Medical Journal Best Practice                             | <a href="https://bestpractice.bmj.com/info/">https://bestpractice.bmj.com/info/</a>                                                               |
| 3  | National Health Service                                           | <a href="https://www.nhs.uk/">https://www.nhs.uk/</a>                                                                                             |
| 4  | Patient                                                           | <a href="https://patient.info/">https://patient.info/</a>                                                                                         |
| 5  | Royal College of Psychiatrists                                    | <a href="https://www.rcpsych.ac.uk/">https://www.rcpsych.ac.uk/</a>                                                                               |
| 6  | Royal College of Paediatrics and Child Health                     | <a href="https://www.rcpch.ac.uk/">https://www.rcpch.ac.uk/</a>                                                                                   |
| 7  | Royal College of General Practitioners                            | <a href="https://www.rcgp.org.uk/">https://www.rcgp.org.uk/</a>                                                                                   |
| 8  | Royal College of Nursing                                          | <a href="https://www.rcn.org.uk/">https://www.rcn.org.uk/</a>                                                                                     |
| 9  | World Health Organisation                                         | <a href="https://www.who.int/">https://www.who.int/</a>                                                                                           |
| 10 | Public Health England                                             | <a href="https://www.gov.uk/government/organisations/public-health-england">https://www.gov.uk/government/organisations/public-health-england</a> |
| 11 | Public Health Scotland                                            | <a href="https://www.gov.scot/">https://www.gov.scot/</a>                                                                                         |
| 12 | Public Health Wales                                               | <a href="http://www.wales.nhs.uk/sitesplus/888/home">http://www.wales.nhs.uk/sitesplus/888/home</a>                                               |
| 13 | HSC Public Health Agency                                          | <a href="https://www.publichealth.hscni.net/">https://www.publichealth.hscni.net/</a>                                                             |
| 14 | Royal Society for Public Health                                   | <a href="https://www.rsph.org.uk/">https://www.rsph.org.uk/</a>                                                                                   |
| 15 | Centre for Mental Health                                          | <a href="https://www.centreformentalhealth.org.uk/">https://www.centreformentalhealth.org.uk/</a>                                                 |
| 16 | British Association for Behavioural and Cognitive Psychotherapies | <a href="https://www.babcp.com/Default.aspx">https://www.babcp.com/Default.aspx</a>                                                               |
| 17 | British Association for Counselling and Psychotherapy             | <a href="https://www.bacp.co.uk/">https://www.bacp.co.uk/</a>                                                                                     |
| 18 | UK Council for Psychotherapy                                      | <a href="https://www.psychotherapy.org.uk/">https://www.psychotherapy.org.uk/</a>                                                                 |
| 19 | British Psychological Society                                     | <a href="https://www.bps.org.uk/">https://www.bps.org.uk/</a>                                                                                     |
| 20 | Samaritans                                                        | <a href="https://www.samaritans.org/">https://www.samaritans.org/</a>                                                                             |
| 21 | SANE                                                              | <a href="http://www.sane.org.uk/home">http://www.sane.org.uk/home</a>                                                                             |
| 22 | CALM                                                              | <a href="https://www.thecalmzone.net/">https://www.thecalmzone.net/</a>                                                                           |
| 23 | Childline                                                         | <a href="https://www.childline.org.uk/">https://www.childline.org.uk/</a>                                                                         |
| 24 | SelfHarmUK                                                        | <a href="https://www.selfharm.co.uk/">https://www.selfharm.co.uk/</a>                                                                             |
| 25 | LifeSIGNS                                                         | <a href="http://www.lifesigns.org.uk/">http://www.lifesigns.org.uk/</a>                                                                           |
| 26 | Harmless                                                          | <a href="http://www.harmless.org.uk/">http://www.harmless.org.uk/</a>                                                                             |
| 27 | Recover Your Life                                                 | <a href="http://www.recoveryourlife.com/">http://www.recoveryourlife.com/</a>                                                                     |
| 28 | Inspire Wellbeing                                                 | <a href="https://www.inspirewellbeing.org/">https://www.inspirewellbeing.org/</a>                                                                 |
| 29 | Papyrus                                                           | <a href="https://papyrus-uk.org/">https://papyrus-uk.org/</a>                                                                                     |
| 30 | BEAT                                                              | <a href="https://www.beateatingdisorders.org.uk/">https://www.beateatingdisorders.org.uk/</a>                                                     |
| 31 | Rethink Mental Illness                                            | <a href="https://www.rethink.org">https://www.rethink.org</a>                                                                                     |
| 32 | Mind                                                              | <a href="https://www.mind.org.uk/">https://www.mind.org.uk/</a>                                                                                   |
| 33 | Battle Scars                                                      | <a href="https://www.battle-scars-self-harm.org.uk/">https://www.battle-scars-self-harm.org.uk/</a>                                               |
| 34 | Mental Health Matters                                             | <a href="https://www.mhm.org.uk/">https://www.mhm.org.uk/</a>                                                                                     |
| 35 | Youth Access                                                      | <a href="https://www.youthaccess.org.uk/">https://www.youthaccess.org.uk/</a>                                                                     |
| 36 | Mood Swings                                                       | <a href="http://www.moodswings.org.uk/">http://www.moodswings.org.uk/</a>                                                                         |
| 37 | No Panic                                                          | <a href="https://www.nopanic.org.uk/">https://www.nopanic.org.uk/</a>                                                                             |
| 38 | Life Centre                                                       | <a href="https://lifecentre.uk.com/">https://lifecentre.uk.com/</a>                                                                               |
| 39 | Survivors UK                                                      | <a href="https://www.survivorsuk.org/">https://www.survivorsuk.org/</a>                                                                           |
| 40 | Self Injury Support Network                                       | <a href="https://www.selfinjurysupport.org.uk/">https://www.selfinjurysupport.org.uk/</a>                                                         |
| 41 | The Mix                                                           | <a href="https://www.themix.org.uk/">https://www.themix.org.uk/</a>                                                                               |
| 42 | Young Minds                                                       | <a href="https://youngminds.org.uk/">https://youngminds.org.uk/</a>                                                                               |
| 43 | MindEd                                                            | <a href="https://www.minded.org.uk/">https://www.minded.org.uk/</a>                                                                               |
| 44 | Child Protection Company                                          | <a href="https://www.childprotectioncompany.com/CPC/index.html">https://www.childprotectioncompany.com/CPC/index.html</a>                         |
| 45 | The Silver Line                                                   | <a href="https://www.thesilverline.org.uk/">https://www.thesilverline.org.uk/</a>                                                                 |
| 46 | Adullam Ministries                                                | <a href="http://www.adullam-ministries.org.uk/site/">http://www.adullam-ministries.org.uk/site/</a>                                               |
| 47 | Scottish Association for Mental Health                            | <a href="https://www.samh.org.uk/">https://www.samh.org.uk/</a>                                                                                   |

|    |                                       |                                                                           |
|----|---------------------------------------|---------------------------------------------------------------------------|
| 48 | Action Mental Health Northern Ireland | <a href="https://www.amh.org.uk/">https://www.amh.org.uk/</a>             |
| 49 | The King's Fund                       | <a href="https://www.kingsfund.org.uk/">https://www.kingsfund.org.uk/</a> |

### Supplementary B. The search strategy and results for each website.

#### 1. National Institute for Health and Care Excellence

Link: <https://www.nice.org.uk/>

Date searched: 16/08/19

Search strategy:

- Website browsed
- Individually searched “self harm”, “self injury”, “deliberate self harm”, “parasuicide”, “self poisoning”, “self cutting” and “self injurious behaviour” in main search bar, filtered to show only advice and guidance

Total hits = 82, of which 16 were duplicates

Results which met eligibility criteria for full-text inclusion:

| #  | Webpage Name                                                                                                                                   | Link                                                                                                                                |
|----|------------------------------------------------------------------------------------------------------------------------------------------------|-------------------------------------------------------------------------------------------------------------------------------------|
| 1  | Psychotropic medicines in people with learning disabilities whose behaviour challenges                                                         | <a href="https://www.nice.org.uk/advice/ktt19">https://www.nice.org.uk/advice/ktt19</a>                                             |
| 2  | Self-harm in over 8s: short-term management and prevention of recurrence                                                                       | <a href="https://www.nice.org.uk/guidance/cg16">https://www.nice.org.uk/guidance/cg16</a>                                           |
| 3  | Self-harm in over 8s: long-term management                                                                                                     | <a href="https://www.nice.org.uk/guidance/cg133">https://www.nice.org.uk/guidance/cg133</a>                                         |
| 4  | Self-harm (quality standard)                                                                                                                   | <a href="https://www.nice.org.uk/guidance/qs34">https://www.nice.org.uk/guidance/qs34</a>                                           |
| 5  | Self-harm in over 8s: short- and long-term management and prevention of recurrence                                                             | <a href="https://www.nice.org.uk/guidance/indevelopment/gid-ng10148">https://www.nice.org.uk/guidance/indevelopment/gid-ng10148</a> |
| 6  | Borderline personality disorder: recognition and management                                                                                    | <a href="https://www.nice.org.uk/guidance/cg78">https://www.nice.org.uk/guidance/cg78</a>                                           |
| 7  | Mental health of adults in contact with the criminal justice system                                                                            | <a href="https://www.nice.org.uk/guidance/ng66">https://www.nice.org.uk/guidance/ng66</a>                                           |
| 8  | Mental health of adults in contact with the criminal justice system                                                                            | <a href="https://www.nice.org.uk/guidance/qs163">https://www.nice.org.uk/guidance/qs163</a>                                         |
| 9  | Obsessive-compulsive disorder and body dysmorphic disorder: treatment                                                                          | <a href="https://www.nice.org.uk/guidance/cg31">https://www.nice.org.uk/guidance/cg31</a>                                           |
| 10 | Depression in children and young people: identification and management                                                                         | <a href="https://www.nice.org.uk/guidance/ng134">https://www.nice.org.uk/guidance/ng134</a>                                         |
| 11 | Generalised anxiety disorder and panic disorder in adults: management                                                                          | <a href="https://www.nice.org.uk/guidance/cg113">https://www.nice.org.uk/guidance/cg113</a>                                         |
| 12 | Bipolar disorder: assessment and management                                                                                                    | <a href="https://www.nice.org.uk/guidance/cg185">https://www.nice.org.uk/guidance/cg185</a>                                         |
| 13 | Challenging behaviour and learning disabilities: prevention and interventions for people with learning disabilities whose behaviour challenges | <a href="https://www.nice.org.uk/guidance/ng11">https://www.nice.org.uk/guidance/ng11</a>                                           |
| 14 | Psychosis and schizophrenia in children and young people: recognition and management                                                           | <a href="https://www.nice.org.uk/guidance/cg155">https://www.nice.org.uk/guidance/cg155</a>                                         |
| 15 | Social anxiety disorder: recognition, assessment and treatment (CG159)                                                                         | <a href="https://www.nice.org.uk/guidance/cg159">https://www.nice.org.uk/guidance/cg159</a>                                         |
| 16 | Personality disorders: borderline and antisocial                                                                                               | <a href="https://www.nice.org.uk/guidance/qs88">https://www.nice.org.uk/guidance/qs88</a>                                           |
| 17 | Antenatal and postnatal mental health                                                                                                          | <a href="https://www.nice.org.uk/guidance/qs115">https://www.nice.org.uk/guidance/qs115</a>                                         |
| 18 | Autism spectrum disorder in under 19s: support and management                                                                                  | <a href="https://www.nice.org.uk/guidance/cg170">https://www.nice.org.uk/guidance/cg170</a>                                         |
| 19 | Autism spectrum disorder in under 19s: recognition, referral and diagnosis                                                                     | <a href="https://www.nice.org.uk/guidance/cg128">https://www.nice.org.uk/guidance/cg128</a>                                         |
| 20 | Depression in adults: recognition and management                                                                                               | <a href="https://www.nice.org.uk/guidance/cg90">https://www.nice.org.uk/guidance/cg90</a>                                           |
| 21 | Eating disorders: recognition and treatment                                                                                                    | <a href="https://www.nice.org.uk/guidance/ng69">https://www.nice.org.uk/guidance/ng69</a>                                           |
| 22 | Bipolar disorder in adults                                                                                                                     | <a href="https://www.nice.org.uk/guidance/qs95">https://www.nice.org.uk/guidance/qs95</a>                                           |

|    |                                                                                                     |                                                                                             |
|----|-----------------------------------------------------------------------------------------------------|---------------------------------------------------------------------------------------------|
| 23 | Depression in children and young people                                                             | <a href="https://www.nice.org.uk/guidance/qs48">https://www.nice.org.uk/guidance/qs48</a>   |
| 24 | Psychosis and schizophrenia in adults: prevention and management                                    | <a href="https://www.nice.org.uk/guidance/cg178">https://www.nice.org.uk/guidance/cg178</a> |
| 25 | Bipolar disorder, psychosis and schizophrenia in children and young people                          | <a href="https://www.nice.org.uk/guidance/qs102">https://www.nice.org.uk/guidance/qs102</a> |
| 26 | Eating disorders                                                                                    | <a href="https://www.nice.org.uk/guidance/qs175">https://www.nice.org.uk/guidance/qs175</a> |
| 27 | Anxiety disorders                                                                                   | <a href="https://www.nice.org.uk/guidance/qs53">https://www.nice.org.uk/guidance/qs53</a>   |
| 28 | Antisocial behaviour and conduct disorders in children and young people: recognition and management | <a href="https://www.nice.org.uk/guidance/cg158">https://www.nice.org.uk/guidance/cg158</a> |
| 29 | Autism spectrum disorder in adults: diagnosis and management                                        | <a href="https://www.nice.org.uk/guidance/cg142">https://www.nice.org.uk/guidance/cg142</a> |
| 30 | Antisocial behaviour and conduct disorders in children and young people                             | <a href="https://www.nice.org.uk/guidance/qs59">https://www.nice.org.uk/guidance/qs59</a>   |
| 31 | Common mental health problems: identification and pathways to care                                  | <a href="https://www.nice.org.uk/guidance/cg123">https://www.nice.org.uk/guidance/cg123</a> |
| 32 | Depression in adults with a chronic physical health problems: recognition and management            | <a href="https://www.nice.org.uk/guidance/cg91">https://www.nice.org.uk/guidance/cg91</a>   |
| 33 | Learning disability: behaviour that challenges                                                      | <a href="https://www.nice.org.uk/guidance/qs101">https://www.nice.org.uk/guidance/qs101</a> |

## 2. British Medical Journal Best Practice

Link: <https://bestpractice.bmj.com/info/>

Date searched: 20/8/19

Search strategy:

- Website browsed
- Search bar not used as required log-in

Total hits = 0

## 3. National Health Service

Link: <https://www.nhs.uk/>

Date searched: 19/08/19

Search strategy:

- Website browsed
- Individually searched “self harm”, “self injury”, “deliberate self harm”, “parasuicide”, “self poisoning”, “self cutting” and “self injurious behaviour” in main search bar

Total hits = 224, of which 4 were duplicates

Results which met eligibility criteria for full-text inclusion:

| # | Webpage Name                                     | Link                                                                                                                                                                                                                                                        |
|---|--------------------------------------------------|-------------------------------------------------------------------------------------------------------------------------------------------------------------------------------------------------------------------------------------------------------------|
| 1 | Self harm: overview                              | <a href="https://www.nhs.uk/conditions/self-harm/">https://www.nhs.uk/conditions/self-harm/</a>                                                                                                                                                             |
| 2 | Calm harm                                        | <a href="https://www.nhs.uk/apps-library/calm-harm/">https://www.nhs.uk/apps-library/calm-harm/</a>                                                                                                                                                         |
| 3 | Talking about self harm                          | <a href="https://www.nhs.uk/video/Pages/Self-harm.aspx">https://www.nhs.uk/video/Pages/Self-harm.aspx</a>                                                                                                                                                   |
| 4 | Study looks at self-harm in young people         | <a href="https://www.nhs.uk/news/mental-health/study-looks-at-self-harm-in-young-people/">https://www.nhs.uk/news/mental-health/study-looks-at-self-harm-in-young-people/</a>                                                                               |
| 5 | Dealing with a mental health crisis or emergency | <a href="https://www.nhs.uk/using-the-nhs/nhs-services/mental-health-services/dealing-with-a-mental-health-crisis-or-emergency/">https://www.nhs.uk/using-the-nhs/nhs-services/mental-health-services/dealing-with-a-mental-health-crisis-or-emergency/</a> |
| 6 | Distract                                         | <a href="https://www.nhs.uk/apps-library/distract/">https://www.nhs.uk/apps-library/distract/</a>                                                                                                                                                           |
| 7 | Depression and low mood                          | <a href="https://www.nhs.uk/video/Pages/bsl-depression.aspx">https://www.nhs.uk/video/Pages/bsl-depression.aspx</a>                                                                                                                                         |
| 8 | BlueIce                                          | <a href="https://www.nhs.uk/apps-library/blueice/">https://www.nhs.uk/apps-library/blueice/</a>                                                                                                                                                             |
| 9 | Bullied children more likely to self-harm        | <a href="https://www.nhs.uk/news/mental-health/bullied-children-more-likely-to-self-harm/">https://www.nhs.uk/news/mental-health/bullied-children-more-likely-to-self-harm/</a>                                                                             |

|    |                                                                           |                                                                                                                                                                                                                               |
|----|---------------------------------------------------------------------------|-------------------------------------------------------------------------------------------------------------------------------------------------------------------------------------------------------------------------------|
| 10 | Goth teens are increased risk of depression and self harm                 | <a href="https://www.nhs.uk/news/mental-health/goth-teens-at-increased-risk-of-depression-and-self-harm/">https://www.nhs.uk/news/mental-health/goth-teens-at-increased-risk-of-depression-and-self-harm/</a>                 |
| 11 | Therapy reduces risk of suicide or self-harm                              | <a href="https://www.nhs.uk/news/mental-health/therapy-reduces-risk-of-suicide-or-self-harm/">https://www.nhs.uk/news/mental-health/therapy-reduces-risk-of-suicide-or-self-harm/</a>                                         |
| 12 | ChatHealth                                                                | <a href="https://www.nhs.uk/apps-library/chathealth/">https://www.nhs.uk/apps-library/chathealth/</a>                                                                                                                         |
| 13 | Nearly a quarter of 14-year-old girls in UK self-harming, charity reports | <a href="https://www.nhs.uk/news/mental-health/nearly-quarter-14-year-old-girls-uk-self-harming-charity-reports/">https://www.nhs.uk/news/mental-health/nearly-quarter-14-year-old-girls-uk-self-harming-charity-reports/</a> |
| 14 | Treatment of depression in children needs improving                       | <a href="https://www.nhs.uk/news/mental-health/treatment-of-depression-in-children-needs-improving/">https://www.nhs.uk/news/mental-health/treatment-of-depression-in-children-needs-improving/</a>                           |
| 15 | Worrying rise in reports of self-harm among teenage girls in UK           | <a href="https://www.nhs.uk/news/mental-health/worrying-rise-reports-self-harm-among-teenage-girls-uk/">https://www.nhs.uk/news/mental-health/worrying-rise-reports-self-harm-among-teenage-girls-uk/</a>                     |
| 16 | Weight loss surgery linked to increased self-harm risk                    | <a href="https://www.nhs.uk/news/mental-health/weight-loss-surgery-linked-to-increased-self-harm-risk/">https://www.nhs.uk/news/mental-health/weight-loss-surgery-linked-to-increased-self-harm-risk/</a>                     |

#### 4. Patient

Link: <https://patient.info/>

Date searched: 18/9/19

Search strategy:

- Website browsed
- Individually searched “self harm”, “self injury”, “deliberate self harm”, “self injurious behaviour”, “self poisoning”, “self cutting”, “parasuicide” and “deliberate self harm” in main search bar, filtered to show only ‘conditions’ and ‘features’

Total hits = 3060

Due to high volume of results and decreasing relevance, only the first 100 search results for each search term were screened

Modified hits = 600, of which 256 were duplicates

Results which met eligibility criteria for full-text inclusion:

| # | Webpage Name                                              | Link                                                                                                                                                                                      |
|---|-----------------------------------------------------------|-------------------------------------------------------------------------------------------------------------------------------------------------------------------------------------------|
| 1 | Self-harm in young people                                 | <a href="https://patient.info/childrens-health/surviving-adolescence/self-harm-in-young-people">https://patient.info/childrens-health/surviving-adolescence/self-harm-in-young-people</a> |
| 2 | What to do if you get the urge to self-harm               | <a href="https://patient.info/news-and-features/what-to-do-if-you-get-the-urge-to-self-harm">https://patient.info/news-and-features/what-to-do-if-you-get-the-urge-to-self-harm</a>       |
| 3 | Paracetamol overdose                                      | <a href="https://patient.info/treatment-medication/paracetamol-overdose">https://patient.info/treatment-medication/paracetamol-overdose</a>                                               |
| 4 | How to improve your self-esteem and be kinder to yourself | <a href="https://patient.info/news-and-features/how-to-boost-self-esteem">https://patient.info/news-and-features/how-to-boost-self-esteem</a>                                             |
| 5 | How to practise self-care                                 | <a href="https://patient.info/news-and-features/what-is-self-care">https://patient.info/news-and-features/what-is-self-care</a>                                                           |
| 6 | Cognitive behavioural therapy                             | <a href="https://patient.info/mental-health/cognitive-behavioural-therapy-cbt-leaflet">https://patient.info/mental-health/cognitive-behavioural-therapy-cbt-leaflet</a>                   |
| 7 | Dealing with depression                                   | <a href="https://patient.info/mental-health/depression-leaflet/dealing-with-depression">https://patient.info/mental-health/depression-leaflet/dealing-with-depression</a>                 |
| 8 | Depression                                                | <a href="https://patient.info/mental-health/depression-leaflet">https://patient.info/mental-health/depression-leaflet</a>                                                                 |
| 9 | Mindfulness                                               | <a href="https://patient.info/mental-health/stress-management/mindfulness">https://patient.info/mental-health/stress-management/mindfulness</a>                                           |

#### 5. Royal College of Psychiatrists

Link: <https://www.rcpsych.ac.uk/>

Date searched: 19/8/19

Search strategy:

- Website browsed
- Individually searched “self harm”, “self injury”, “deliberate self harm”, “parasuicide”, “self poisoning”, “self cutting” and “self injurious behaviour” in main search bar

Total hits = 133, of which 33 were duplicates

Results which met eligibility criteria for full-text inclusion:

| #  | Webpage Name                                                                                                               | Link                                                                                                                                                                                                                                                                                                                                                                                                                                                                                                                                                                                                                                                                                                                                                                                                                                                                                                                                                                                                                                                                                                                                                                                                                                                                                                                                                                                                                                                                                                                                                                                                                                                                                                                                                                                                  |
|----|----------------------------------------------------------------------------------------------------------------------------|-------------------------------------------------------------------------------------------------------------------------------------------------------------------------------------------------------------------------------------------------------------------------------------------------------------------------------------------------------------------------------------------------------------------------------------------------------------------------------------------------------------------------------------------------------------------------------------------------------------------------------------------------------------------------------------------------------------------------------------------------------------------------------------------------------------------------------------------------------------------------------------------------------------------------------------------------------------------------------------------------------------------------------------------------------------------------------------------------------------------------------------------------------------------------------------------------------------------------------------------------------------------------------------------------------------------------------------------------------------------------------------------------------------------------------------------------------------------------------------------------------------------------------------------------------------------------------------------------------------------------------------------------------------------------------------------------------------------------------------------------------------------------------------------------------|
| 1  | Self-harm                                                                                                                  | <a href="https://www.rcpsych.ac.uk/mental-health/problems-disorders/self-harm?searchTerms=%22self%20harm%22">https://www.rcpsych.ac.uk/mental-health/problems-disorders/self-harm?searchTerms=%22self%20harm%22</a>                                                                                                                                                                                                                                                                                                                                                                                                                                                                                                                                                                                                                                                                                                                                                                                                                                                                                                                                                                                                                                                                                                                                                                                                                                                                                                                                                                                                                                                                                                                                                                                   |
| 2  | Self-Harm and Suicide Prevention Competence Frameworks                                                                     | <a href="https://www.rcpsych.ac.uk/improving-care/nccmh/other-work/self-harm-and-suicide-prevention-competence-frameworks?searchTerms=%22self%20harm%22">https://www.rcpsych.ac.uk/improving-care/nccmh/other-work/self-harm-and-suicide-prevention-competence-frameworks?searchTerms=%22self%20harm%22</a><br><a href="https://www.rcpsych.ac.uk/docs/default-source/improving-care/nccmh/nccmh-self-harm-and-suicide-prevention-competence-framework-children-and-young.pdf?sfvrsn=29d0a351_2">https://www.rcpsych.ac.uk/docs/default-source/improving-care/nccmh/nccmh-self-harm-and-suicide-prevention-competence-framework-children-and-young.pdf?sfvrsn=29d0a351_2</a><br><a href="https://www.rcpsych.ac.uk/docs/default-source/improving-care/nccmh/nccmh-self-harm-and-suicide-prevention-competence-framework-adults-and-older-adults.pdf?sfvrsn=5c12349f_2">https://www.rcpsych.ac.uk/docs/default-source/improving-care/nccmh/nccmh-self-harm-and-suicide-prevention-competence-framework-adults-and-older-adults.pdf?sfvrsn=5c12349f_2</a><br><a href="https://www.rcpsych.ac.uk/docs/default-source/improving-care/nccmh/nccmh-self-harm-and-suicide-prevention-competence-framework-public-health.pdf?sfvrsn=341fb3cd_2">https://www.rcpsych.ac.uk/docs/default-source/improving-care/nccmh/nccmh-self-harm-and-suicide-prevention-competence-framework-public-health.pdf?sfvrsn=341fb3cd_2</a><br><a href="https://www.rcpsych.ac.uk/docs/default-source/improving-care/nccmh/nccmh-self-harm-and-suicide-prevention-competence-framework-service-user-and-carer-report.pdf?sfvrsn=959b6695_2">https://www.rcpsych.ac.uk/docs/default-source/improving-care/nccmh/nccmh-self-harm-and-suicide-prevention-competence-framework-service-user-and-carer-report.pdf?sfvrsn=959b6695_2</a> |
| 3  | Self-harm in young people: for parents and carers                                                                          | <a href="https://www.rcpsych.ac.uk/mental-health/parents-and-young-people/information-for-parents-and-carers/self-harm-in-young-people-for-parents-and-carers?searchTerms=" self%20harm"="">https://www.rcpsych.ac.uk/mental-health/parents-and-young-people/information-for-parents-and-carers/self-harm-in-young-people-for-parents-and-carers?searchTerms="self%20harm"</a>                                                                                                                                                                                                                                                                                                                                                                                                                                                                                                                                                                                                                                                                                                                                                                                                                                                                                                                                                                                                                                                                                                                                                                                                                                                                                                                                                                                                                        |
| 4  | Position Statement 2010: Self-harm, suicide and risk: a summary                                                            | <a href="https://www.rcpsych.ac.uk/docs/default-source/improving-care/better-mh-policy/position-statements/ps03-2010.pdf?sfvrsn=aece6c9c_4">https://www.rcpsych.ac.uk/docs/default-source/improving-care/better-mh-policy/position-statements/ps03-2010.pdf?sfvrsn=aece6c9c_4</a>                                                                                                                                                                                                                                                                                                                                                                                                                                                                                                                                                                                                                                                                                                                                                                                                                                                                                                                                                                                                                                                                                                                                                                                                                                                                                                                                                                                                                                                                                                                     |
| 5  | Suicide Prevention National Transformation Programme                                                                       | <a href="https://www.rcpsych.ac.uk/improving-care/nccmh/national-suicide-prevention-programme?searchTerms=%22self%20harm%22">https://www.rcpsych.ac.uk/improving-care/nccmh/national-suicide-prevention-programme?searchTerms=%22self%20harm%22</a><br><a href="https://www.rcpsych.ac.uk/docs/default-source/improving-care/nccmh/suicide-prevention/coping-with-self-harm-brochure.pdf?sfvrsn=336b1409_2">https://www.rcpsych.ac.uk/docs/default-source/improving-care/nccmh/suicide-prevention/coping-with-self-harm-brochure.pdf?sfvrsn=336b1409_2</a><br><a href="https://www.rcpsych.ac.uk/docs/default-source/improving-care/nccmh/suicide-prevention/young-people-who-self-harm-a-guide-for-school-staff.pdf?sfvrsn=e6ebf7ca_2">https://www.rcpsych.ac.uk/docs/default-source/improving-care/nccmh/suicide-prevention/young-people-who-self-harm-a-guide-for-school-staff.pdf?sfvrsn=e6ebf7ca_2</a>                                                                                                                                                                                                                                                                                                                                                                                                                                                                                                                                                                                                                                                                                                                                                                                                                                                                                           |
| 6  | Special Interest Days – Suicide and Self-harm – January 2017                                                               | <a href="https://www.rcpsych.ac.uk/improving-care/ccqi/quality-networks-accreditation/psychiatric-liaison-accreditation-network-plan/events/special-interest-days?searchTerms=%22self%20harm%22">https://www.rcpsych.ac.uk/improving-care/ccqi/quality-networks-accreditation/psychiatric-liaison-accreditation-network-plan/events/special-interest-days?searchTerms=%22self%20harm%22</a>                                                                                                                                                                                                                                                                                                                                                                                                                                                                                                                                                                                                                                                                                                                                                                                                                                                                                                                                                                                                                                                                                                                                                                                                                                                                                                                                                                                                           |
| 7  | Feeling on the edge                                                                                                        | <a href="https://www.rcpsych.ac.uk/mental-health/problems-disorders/feeling-on-the-edge?searchTerms=%22self%20harm%22">https://www.rcpsych.ac.uk/mental-health/problems-disorders/feeling-on-the-edge?searchTerms=%22self%20harm%22</a>                                                                                                                                                                                                                                                                                                                                                                                                                                                                                                                                                                                                                                                                                                                                                                                                                                                                                                                                                                                                                                                                                                                                                                                                                                                                                                                                                                                                                                                                                                                                                               |
| 8  | Feeling overwhelmed                                                                                                        | <a href="https://www.rcpsych.ac.uk/mental-health/problems-disorders/feeling-overwhelmed?searchTerms=%22self%20harm%22">https://www.rcpsych.ac.uk/mental-health/problems-disorders/feeling-overwhelmed?searchTerms=%22self%20harm%22</a>                                                                                                                                                                                                                                                                                                                                                                                                                                                                                                                                                                                                                                                                                                                                                                                                                                                                                                                                                                                                                                                                                                                                                                                                                                                                                                                                                                                                                                                                                                                                                               |
| 9  | Psychiatrists should consider impact of social media on all children they assess, leading medical body says for first time | <a href="https://www.rcpsych.ac.uk/news-and-features/latest-news/detail/2019/03/30/psychiatrists-should-consider-impact-of-social-media-on-all-children-they-assess-leading-medical-body-says-for-first-time?searchTerms=%22self%20harm%22">https://www.rcpsych.ac.uk/news-and-features/latest-news/detail/2019/03/30/psychiatrists-should-consider-impact-of-social-media-on-all-children-they-assess-leading-medical-body-says-for-first-time?searchTerms=%22self%20harm%22</a>                                                                                                                                                                                                                                                                                                                                                                                                                                                                                                                                                                                                                                                                                                                                                                                                                                                                                                                                                                                                                                                                                                                                                                                                                                                                                                                     |
| 10 | U can cope! How to cope when life is difficult – for young people                                                          | <a href="https://www.rcpsych.ac.uk/mental-health/parents-and-young-people/young-people/u-can-cope!-how-to-cope-when-life-is-difficult-for-young-people?searchTerms=%22self%20harm%22">https://www.rcpsych.ac.uk/mental-health/parents-and-young-people/young-people/u-can-cope!-how-to-cope-when-life-is-difficult-for-young-people?searchTerms=%22self%20harm%22</a>                                                                                                                                                                                                                                                                                                                                                                                                                                                                                                                                                                                                                                                                                                                                                                                                                                                                                                                                                                                                                                                                                                                                                                                                                                                                                                                                                                                                                                 |

|    |                                                                                |                                                                                                                                                                                                                                                                                                                                                                                                                                                             |
|----|--------------------------------------------------------------------------------|-------------------------------------------------------------------------------------------------------------------------------------------------------------------------------------------------------------------------------------------------------------------------------------------------------------------------------------------------------------------------------------------------------------------------------------------------------------|
| 11 | Personality disorder                                                           | <a href="https://www.rcpsych.ac.uk/mental-health/problems-disorders/personality-disorder?searchTerms=%22self%20harm%22">https://www.rcpsych.ac.uk/mental-health/problems-disorders/personality-disorder?searchTerms=%22self%20harm%22</a>                                                                                                                                                                                                                   |
| 12 | Depression in young people – helping children to cope – for parents and carers | <a href="https://www.rcpsych.ac.uk/mental-health/parents-and-young-people/information-for-parents-and-carers/depression-in-young-people--helping-children-to-cope-for-parents-and-carers?searchTerms=%22self%20harm%22">https://www.rcpsych.ac.uk/mental-health/parents-and-young-people/information-for-parents-and-carers/depression-in-young-people--helping-children-to-cope-for-parents-and-carers?searchTerms=%22self%20harm%22</a>                   |
| 13 | Psychosis – for young people                                                   | <a href="https://www.rcpsych.ac.uk/mental-health/parents-and-young-people/young-people/psychosis--for-young-people?searchTerms=%22self%20harm%22">https://www.rcpsych.ac.uk/mental-health/parents-and-young-people/young-people/psychosis--for-young-people?searchTerms=%22self%20harm%22</a>                                                                                                                                                               |
| 14 | Bipolar disorder: for young people                                             | <a href="https://www.rcpsych.ac.uk/mental-health/parents-and-young-people/young-people/bipolar-disorder-for-young-people?searchTerms=%22self%20harm%22">https://www.rcpsych.ac.uk/mental-health/parents-and-young-people/young-people/bipolar-disorder-for-young-people?searchTerms=%22self%20harm%22</a>                                                                                                                                                   |
| 15 | Alcohol and depression                                                         | <a href="https://www.rcpsych.ac.uk/mental-health/problems-disorders/alcohol-and-depression?searchTerms=%22self%20harm%22">https://www.rcpsych.ac.uk/mental-health/problems-disorders/alcohol-and-depression?searchTerms=%22self%20harm%22</a>                                                                                                                                                                                                               |
| 16 | Schizophrenia for parents and carers                                           | <a href="https://www.rcpsych.ac.uk/mental-health/parents-and-young-people/information-for-parents-and-carers/schizophrenia-for-parents-and-carers?searchTerms=%22self%20harm%22">https://www.rcpsych.ac.uk/mental-health/parents-and-young-people/information-for-parents-and-carers/schizophrenia-for-parents-and-carers?searchTerms=%22self%20harm%22</a>                                                                                                 |
| 17 | Schizophrenia                                                                  | <a href="https://www.rcpsych.ac.uk/mental-health/problems-disorders/schizophrenia?searchTerms=%22self%20harm%22">https://www.rcpsych.ac.uk/mental-health/problems-disorders/schizophrenia?searchTerms=%22self%20harm%22</a>                                                                                                                                                                                                                                 |
| 18 | Bipolar disorder information for parents and carers                            | <a href="https://www.rcpsych.ac.uk/mental-health/parents-and-young-people/information-for-parents-and-carers/bipolar-affective-disorder-for-parents-carers-and-anyone-who-works-with-young-people?searchTerms=%22self%20harm%22">https://www.rcpsych.ac.uk/mental-health/parents-and-young-people/information-for-parents-and-carers/bipolar-affective-disorder-for-parents-carers-and-anyone-who-works-with-young-people?searchTerms=%22self%20harm%22</a> |
| 19 | Schizoaffective disorder                                                       | <a href="https://www.rcpsych.ac.uk/mental-health/problems-disorders/schizoaffective-disorder?searchTerms=%22self%20harm%22">https://www.rcpsych.ac.uk/mental-health/problems-disorders/schizoaffective-disorder?searchTerms=%22self%20harm%22</a>                                                                                                                                                                                                           |
| 20 | Eating well and mental health                                                  | <a href="https://www.rcpsych.ac.uk/mental-health/problems-disorders/eating-well-and-mental-health?searchTerms=%22self%20harm%22">https://www.rcpsych.ac.uk/mental-health/problems-disorders/eating-well-and-mental-health?searchTerms=%22self%20harm%22</a>                                                                                                                                                                                                 |
| 21 | Mental health in pregnancy                                                     | <a href="https://www.rcpsych.ac.uk/mental-health/treatments-and-wellbeing/mental-health-in-pregnancy?searchTerms=%22self%20harm%22">https://www.rcpsych.ac.uk/mental-health/treatments-and-wellbeing/mental-health-in-pregnancy?searchTerms=%22self%20harm%22</a>                                                                                                                                                                                           |
| 22 | The child with general learning disability: for parents and carers             | <a href="https://www.rcpsych.ac.uk/mental-health/parents-and-young-people/information-for-parents-and-carers/the-child-with-general-learning-disability-for-parents-and-carers?searchTerms=%22self%20injury%22">https://www.rcpsych.ac.uk/mental-health/parents-and-young-people/information-for-parents-and-carers/the-child-with-general-learning-disability-for-parents-and-carers?searchTerms=%22self%20injury%22</a>                                   |

## 6. Royal College of Paediatrics and Child Health

Link: <https://www.rcpch.ac.uk/>

Date searched: 21/8/19

Search strategy:

- Website browsed
- Individually searched “self harm”, “self injury”, “deliberate self harm”, “parasuicide”, “self poisoning”, “self cutting” and “self injurious behaviour” in main search bar

Total hits = 2, of which 0 were duplicates

No results met eligibility criteria for full-text inclusion

## 7. Royal College of General Practitioners

Link: <https://www.rcgp.org.uk/>

Date searched: 20/8/19

Search strategy:

- Website browsed
- Individually searched “self harm”, “self injury”, “self poisoning”, “deliberate self harm”, “parasuicide”, “self cutting”, “self injurious behaviour” in main search bar

Total hits = 15, of which 4 were duplicates

## Results which met eligibility criteria for full-text inclusion:

| # | Webpage Name                                                             | Link                                                                                                                                                                                                                                                                                                                                                                                                                                                                                                                                                                                                                                                                                                                                                                                                                                                                                                                                                                                                                                                                                                                                                                                                                                                                                                                                                                                                                                                                                                                                                                                                                                                                                                                                                                                                                                                                       |
|---|--------------------------------------------------------------------------|----------------------------------------------------------------------------------------------------------------------------------------------------------------------------------------------------------------------------------------------------------------------------------------------------------------------------------------------------------------------------------------------------------------------------------------------------------------------------------------------------------------------------------------------------------------------------------------------------------------------------------------------------------------------------------------------------------------------------------------------------------------------------------------------------------------------------------------------------------------------------------------------------------------------------------------------------------------------------------------------------------------------------------------------------------------------------------------------------------------------------------------------------------------------------------------------------------------------------------------------------------------------------------------------------------------------------------------------------------------------------------------------------------------------------------------------------------------------------------------------------------------------------------------------------------------------------------------------------------------------------------------------------------------------------------------------------------------------------------------------------------------------------------------------------------------------------------------------------------------------------|
| 1 | Mental health: self-harming in older adults has distinct characteristics | <a href="https://www.rcgp.org.uk/clinical-and-research/about/clinical-news/2019/may/mental-health-self-harming-in-older-adults-has-distinct-characteristics.aspx">https://www.rcgp.org.uk/clinical-and-research/about/clinical-news/2019/may/mental-health-self-harming-in-older-adults-has-distinct-characteristics.aspx</a>                                                                                                                                                                                                                                                                                                                                                                                                                                                                                                                                                                                                                                                                                                                                                                                                                                                                                                                                                                                                                                                                                                                                                                                                                                                                                                                                                                                                                                                                                                                                              |
| 2 | Youth mental health resources                                            | <a href="https://www.rcgp.org.uk/clinical-and-research/resources/a-to-z-clinical-resources/youth-mental-health/youth-mental-health-resources.aspx">https://www.rcgp.org.uk/clinical-and-research/resources/a-to-z-clinical-resources/youth-mental-health/youth-mental-health-resources.aspx</a><br><a href="https://www.rcgp.org.uk/clinical-and-research/resources/a-to-z-clinical-resources/youth-mental-health/youth-mental-health-resources.aspx">https://www.rcgp.org.uk/clinical-and-research/resources/a-to-z-clinical-resources/youth-mental-health/youth-mental-health-resources.aspx</a><br><a href="https://www.rcgp.org.uk/-/media/Files/CIRC/Child-and-Adolescent-Health/RCGP-The-Daily-Mail-News-Article-December-2014.ashx?la=en">https://www.rcgp.org.uk/-/media/Files/CIRC/Child-and-Adolescent-Health/RCGP-The-Daily-Mail-News-Article-December-2014.ashx?la=en</a><br><a href="https://www.rcgp.org.uk/clinical-and-research/resources/a-to-z-clinical-resources/youth-mental-health/youth-mental-health-policies-and-reports.aspx">https://www.rcgp.org.uk/clinical-and-research/resources/a-to-z-clinical-resources/youth-mental-health/youth-mental-health-policies-and-reports.aspx</a>                                                                                                                                                                                                                                                                                                                                                                                                                                                                                                                                                                                                                                                             |
| 3 | Youth mental health policies and reports                                 | <a href="https://assets.publishing.service.gov.uk/government/uploads/system/uploads/attachment_data/file/252660/33571_2901304_CMO_Chapter_10.pdf">https://assets.publishing.service.gov.uk/government/uploads/system/uploads/attachment_data/file/252660/33571_2901304_CMO_Chapter_10.pdf</a><br><a href="https://assets.publishing.service.gov.uk/government/uploads/system/uploads/attachment_data/file/216853/CYP-Mental-Health.pdf">https://assets.publishing.service.gov.uk/government/uploads/system/uploads/attachment_data/file/216853/CYP-Mental-Health.pdf</a><br><a href="https://www.rcgp.org.uk/clinical-and-research/resources/a-to-z-clinical-resources/mental-health.aspx">https://www.rcgp.org.uk/clinical-and-research/resources/a-to-z-clinical-resources/mental-health.aspx</a><br><a href="https://www.rcgp.org.uk/clinical-and-research/resources/toolkits/mental-health-toolkit.aspx">https://www.rcgp.org.uk/clinical-and-research/resources/toolkits/mental-health-toolkit.aspx</a><br><a href="https://www.rcgp.org.uk/-/media/Files/CIRC/Mental-Health---2014/Mental-Health-2017/RCGP-PS-mental-health-nov-2017.ashx?la=en">https://www.rcgp.org.uk/-/media/Files/CIRC/Mental-Health---2014/Mental-Health-2017/RCGP-PS-mental-health-nov-2017.ashx?la=en</a><br><a href="https://www.sabp.nhs.uk/moodhive">https://www.sabp.nhs.uk/moodhive</a><br><a href="https://www.rcgp.org.uk/clinical-and-research/resources/toolkits/-/media/BEA12970F05A4BC48DC64CD59474188B.ashx">https://www.rcgp.org.uk/clinical-and-research/resources/toolkits/-/media/BEA12970F05A4BC48DC64CD59474188B.ashx</a><br><a href="https://www.rcgp.org.uk/clinical-and-research/resources/toolkits/~/_media/64FB9338D39B494FA635B9A5C3A8B424.ashx">https://www.rcgp.org.uk/clinical-and-research/resources/toolkits/~/_media/64FB9338D39B494FA635B9A5C3A8B424.ashx</a> |
| 4 | Mental health                                                            | <a href="https://www.rcgp.org.uk/clinical-and-research/resources/toolkits/~/_media/0309F0E94E5D4EA8B6414E3BF637971F.ashx">https://www.rcgp.org.uk/clinical-and-research/resources/toolkits/~/_media/0309F0E94E5D4EA8B6414E3BF637971F.ashx</a><br><a href="https://www.rcgp.org.uk/clinical-and-research/resources/toolkits/~/_media/54C328D6A0434A4982338AC03FF424BF.ashx">https://www.rcgp.org.uk/clinical-and-research/resources/toolkits/~/_media/54C328D6A0434A4982338AC03FF424BF.ashx</a><br><a href="https://www.rcgp.org.uk/clinical-and-research/resources/toolkits/~/_media/97B6C76D1B1F4FA7924B7DBD2044AEF1.ashx">https://www.rcgp.org.uk/clinical-and-research/resources/toolkits/~/_media/97B6C76D1B1F4FA7924B7DBD2044AEF1.ashx</a><br><a href="https://www.mentalhealth.org.uk/sites/default/files/fundamental-facts-about-mental-health-2016.pdf">https://www.mentalhealth.org.uk/sites/default/files/fundamental-facts-about-mental-health-2016.pdf</a>                                                                                                                                                                                                                                                                                                                                                                                                                                                                                                                                                                                                                                                                                                                                                                                                                                                                                                     |
| 5 | The state of youth mental health                                         | <a href="https://www.rcgp.org.uk/clinical-and-research/resources/a-to-z-clinical-resources/youth-mental-health/the-state-of-youth-mental-health.aspx">https://www.rcgp.org.uk/clinical-and-research/resources/a-to-z-clinical-resources/youth-mental-health/the-state-of-youth-mental-health.aspx</a>                                                                                                                                                                                                                                                                                                                                                                                                                                                                                                                                                                                                                                                                                                                                                                                                                                                                                                                                                                                                                                                                                                                                                                                                                                                                                                                                                                                                                                                                                                                                                                      |
| 6 | Impact on the physical health of people living with a mental illness     | <a href="https://www.rcgp.org.uk/clinical-and-research/about/clinical-news/2018/april/impact-on-the-physical-health-of-people-living-with-a-mental-illness.aspx">https://www.rcgp.org.uk/clinical-and-research/about/clinical-news/2018/april/impact-on-the-physical-health-of-people-living-with-a-mental-illness.aspx</a>                                                                                                                                                                                                                                                                                                                                                                                                                                                                                                                                                                                                                                                                                                                                                                                                                                                                                                                                                                                                                                                                                                                                                                                                                                                                                                                                                                                                                                                                                                                                                |

8. Royal College of Nursing

Link: <https://www.rcn.org.uk/>

Date searched: 20/8/19

Search strategy:

- Website browsed
- Individually searched “self harm”, “self injury”, “self poisoning”, “deliberate self harm”, “parasuicide”, “self cutting” and “self injurious behaviour” in main search bar

Total hits = 4, of which 0 were duplicates

Results which met eligibility criteria for full-text inclusion:

| # | Webpage Name                                       | Link                                                                                                                                                                                                                                                                                                                                                                                                                                                                                                                                                                                                                                                                                                                       |
|---|----------------------------------------------------|----------------------------------------------------------------------------------------------------------------------------------------------------------------------------------------------------------------------------------------------------------------------------------------------------------------------------------------------------------------------------------------------------------------------------------------------------------------------------------------------------------------------------------------------------------------------------------------------------------------------------------------------------------------------------------------------------------------------------|
| 1 | Children and Young People: Mental Health Promotion | <a href="https://www.rcn.org.uk/library/subject-guides/children-and-young-people-mental-health-promotion#tab1">https://www.rcn.org.uk/library/subject-guides/children-and-young-people-mental-health-promotion#tab1</a><br><a href="https://www.rcn.org.uk/professional-development/publications/pub-006021">https://www.rcn.org.uk/professional-development/publications/pub-006021</a><br><a href="https://www.rcn.org.uk/professional-development/publications/pub-004587">https://www.rcn.org.uk/professional-development/publications/pub-004587</a><br><a href="https://www.rcn.org.uk/professional-development/publications/pub-003311">https://www.rcn.org.uk/professional-development/publications/pub-003311</a> |

## 9. World Health Organisation

Link: <https://www.who.int/>

Date searched: 18/9/19

Search strategy:

- Website browsed
- Individually searched “self harm”, “parasuicide”, “self injury”, “self cutting”, “self poisoning”, “self injurious behaviour” and “deliberate self harm” in main search bar, filtered to show only results in the UK

Total hits = 91, of which 57 were duplicates

Results which met eligibility criteria for full-text inclusion:

| # | Webpage Name                                                                                                                                  | Link                                                                                                                                                                                                                                                                                                                                                                                                      |
|---|-----------------------------------------------------------------------------------------------------------------------------------------------|-----------------------------------------------------------------------------------------------------------------------------------------------------------------------------------------------------------------------------------------------------------------------------------------------------------------------------------------------------------------------------------------------------------|
| 1 | Understanding and addressing the mental health needs of adolescents                                                                           | <a href="http://www.euro.who.int/en/countries/belarus/news/news/2018/01/understanding-and-addressing-the-mental-health-needs-of-adolescents">http://www.euro.who.int/en/countries/belarus/news/news/2018/01/understanding-and-addressing-the-mental-health-needs-of-adolescents</a>                                                                                                                       |
| 2 | For which strategies of suicide prevention is there evidence of effectiveness?                                                                | <a href="http://www.euro.who.int/en/data-and-evidence/evidence-informed-policy-making/publications/pre2009/for-which-strategies-of-suicide-prevention-is-there-evidence-of-effectiveness">http://www.euro.who.int/en/data-and-evidence/evidence-informed-policy-making/publications/pre2009/for-which-strategies-of-suicide-prevention-is-there-evidence-of-effectiveness</a>                             |
| 3 | Anna’s story                                                                                                                                  | <a href="http://www.euro.who.int/en/health-topics/noncommunicable-diseases/mental-health/data-and-resources/personal-stories/annas-story">http://www.euro.who.int/en/health-topics/noncommunicable-diseases/mental-health/data-and-resources/personal-stories/annas-story</a>                                                                                                                             |
| 4 | Northern Ireland, United Kingdom: Caitriona Cassidy                                                                                           | <a href="http://www.euro.who.int/en/health-topics/Health-systems/pages/personal-stories/people-centred-health-systems-voices-of-patients-and-carers/northern-ireland,-united-kingdom-caitriona-cassidy">http://www.euro.who.int/en/health-topics/Health-systems/pages/personal-stories/people-centred-health-systems-voices-of-patients-and-carers/northern-ireland,-united-kingdom-caitriona-cassidy</a> |
| 5 | New WHO publication encourages investment in the health of adolescents in Europe – Adolescent health in the European Union: can we do better? | <a href="http://www.euro.who.int/_data/assets/pdf_file/0005/407219/AA-HA-adaptation-V7_maket_10.07.19_e_book_2.pdf?ua=1">http://www.euro.who.int/_data/assets/pdf_file/0005/407219/AA-HA-adaptation-V7_maket_10.07.19_e_book_2.pdf?ua=1</a>                                                                                                                                                               |
| 6 | Wilma’s story                                                                                                                                 | <a href="http://www.euro.who.int/en/health-topics/noncommunicable-diseases/mental-health/data-and-resources/personal-stories/wilmas-story">http://www.euro.who.int/en/health-topics/noncommunicable-diseases/mental-health/data-and-resources/personal-stories/wilmas-story</a>                                                                                                                           |
| 7 | Integrating the prevention, treatment and care of mental health conditions and other                                                          | <a href="http://www.euro.who.int/_data/assets/pdf_file/0004/397786/Mental-Health-Conditions-ENG.pdf?ua=1">http://www.euro.who.int/_data/assets/pdf_file/0004/397786/Mental-Health-Conditions-ENG.pdf?ua=1</a>                                                                                                                                                                                             |



|   |                                                             |                                                                                                                                                      |
|---|-------------------------------------------------------------|------------------------------------------------------------------------------------------------------------------------------------------------------|
|   | non-communicable diseases<br>within health systems          |                                                                                                                                                      |
| 8 | Mental health: facing the<br>challenges, building solutions | <a href="http://www.euro.who.int/data/assets/pdf_file/0008/96452/E87301.pdf">http://www.euro.who.int/ data/assets/pdf file/0008/96452/E87301.pdf</a> |

## 10. Public Health England

Link: <https://www.gov.uk/government/organisations/public-health-england>

Date searched: 24/9/19

Search strategy:

- Website browsed
- Individually searched “self harm”, “self injury”, “parasuicide”, “self cutting”, “self poisoning”, “self injurious behaviour” and “deliberate self harm” in main search bar, filtered to only show ‘guidance and regulation, ‘research and statistics’ and ‘policy papers and consultations’

Total hits = 86, of which 4 were duplicates

Results which met eligibility criteria for full-text inclusion:

| # | Webpage Name                                                        | Link                                                                                                                                                                                                                          |
|---|---------------------------------------------------------------------|-------------------------------------------------------------------------------------------------------------------------------------------------------------------------------------------------------------------------------|
| 1 | Intentional self-poisoning<br>by young people                       | <a href="https://www.gov.uk/government/publications/intentional-self-poisoning-by-young-people">https://www.gov.uk/government/publications/intentional-self-poisoning-by-young-people</a>                                     |
| 2 | Self harm reduction<br>strategy                                     | <a href="https://www.gov.uk/government/publications/assessing-care-in-detention-self-harm-reduction-strategy">https://www.gov.uk/government/publications/assessing-care-in-detention-self-harm-reduction-strategy</a>         |
| 3 | Suicide and self-harm<br>prevention in prison                       | <a href="https://www.gov.uk/guidance/suicide-self-harm-prevention-in-prison">https://www.gov.uk/guidance/suicide-self-harm-prevention-in-prison</a>                                                                           |
| 4 | Mental health and self-<br>harm in children and<br>young people     | <a href="https://www.gov.uk/government/publications/mental-health-and-self-harm-in-children-and-young-people">https://www.gov.uk/government/publications/mental-health-and-self-harm-in-children-and-young-people</a>         |
| 5 | Self-harm by adult men in<br>prison: a rapid evidence<br>assessment | <a href="https://www.gov.uk/government/publications/self-harm-by-adult-men-in-prison-a-rapid-evidence-assessment">https://www.gov.uk/government/publications/self-harm-by-adult-men-in-prison-a-rapid-evidence-assessment</a> |

## 11. Public Health Scotland

Link: <https://www.gov.scot/>

Date searched: 24/9/19

Search strategy:

- Website browsed
- Individually searched “self harm”, “self injury”, “parasuicide”, “self injurious behaviour”, “self cutting”, “self poisoning”, and “deliberate self harm” in main search bar

Total hits = 79, of which 7 were duplicates

Results which met eligibility criteria for full-text inclusion:

| # | Webpage Name                                                                               | Link                                                                                                                                                                                                                                                                                                                                                                                                                                                                                                                                                                                                                                                                                                                                                                                                      |
|---|--------------------------------------------------------------------------------------------|-----------------------------------------------------------------------------------------------------------------------------------------------------------------------------------------------------------------------------------------------------------------------------------------------------------------------------------------------------------------------------------------------------------------------------------------------------------------------------------------------------------------------------------------------------------------------------------------------------------------------------------------------------------------------------------------------------------------------------------------------------------------------------------------------------------|
| 1 | Working with children and adults<br>who may be at risk of self-harm:<br>practical guidance | <a href="https://www.gov.scot/publications/working-children-adults-risk-self-harm-practice-guidance-information-sharing-protection-confidentiality/">https://www.gov.scot/publications/working-children-adults-risk-self-harm-practice-guidance-information-sharing-protection-confidentiality/</a><br><a href="https://www.webarchive.org.uk/wayback/archive/20180516085145/http://www.gov.scot/Publications/2011/03/17153551/2">https://www.webarchive.org.uk/wayback/archive/20180516085145/http://www.gov.scot/Publications/2011/03/17153551/2</a><br><a href="https://www.webarchive.org.uk/wayback/archive/20180516085145/http://www.gov.scot/Publications/2011/03/17153551/2">https://www.webarchive.org.uk/wayback/archive/20180516085145/http://www.gov.scot/Publications/2011/03/17153551/2</a> |
| 2 | Child and adolescent mental<br>health                                                      | <a href="https://www.gov.scot/news/child-and-adolescent-mental-health/">https://www.gov.scot/news/child-and-adolescent-mental-health/</a>                                                                                                                                                                                                                                                                                                                                                                                                                                                                                                                                                                                                                                                                 |

## 12. Public Health Wales

Link: <http://www.wales.nhs.uk/sitesplus/888/home>

Date searched: 24/9/19

Search strategy:

- Website browsed
- Individually searched “self harm”, “self injury”, “parasuicide”, “self injurious behaviour”, “self cutting”, “self poisoning” and “deliberate self harm” in main search bar, with search terms entered into the ‘exact phrase’ box, filtered to show only pages and documents

Total hits = 58, of which 10 were duplicates

Results which met eligibility criteria for full-text inclusion:

| # | Webpage Name                 | Link                                                                                                              |
|---|------------------------------|-------------------------------------------------------------------------------------------------------------------|
| 1 | Talk to me: Mid Point Review | No URL available as downloaded as Microsoft Word document                                                         |
| 2 | Suicide and self harm        | <a href="http://www.wales.nhs.uk/sitesplus/888/page/65108/">http://www.wales.nhs.uk/sitesplus/888/page/65108/</a> |

### 13. HSC Public Health Agency

Link: <https://www.publichealth.hscni.net/>

Date searched: 24/9/19

Search strategy:

- Website browsed
- Individually searched “self harm”, “self injury”, “parasuicide”, “self injurious behaviour”, “deliberate self harm”, “self cutting” and “self poisoning” in main search bar

Total hits = 23, of which 0 were duplicates

Results which met eligibility criteria for full-text inclusion:

| # | Webpage Name                                                                                       | Link                                                                                                                                                                                                                                                                                                |
|---|----------------------------------------------------------------------------------------------------|-----------------------------------------------------------------------------------------------------------------------------------------------------------------------------------------------------------------------------------------------------------------------------------------------------|
| 1 | PHA published 3 year report into self-harm in Northern Ireland                                     | <a href="https://www.publichealth.hscni.net/news/pha-publishes-three-year-report-self-harm-northern-ireland">https://www.publichealth.hscni.net/news/pha-publishes-three-year-report-self-harm-northern-ireland</a>                                                                                 |
| 2 | Public Health Agency Self-Harm Symposium Conference Report                                         | <a href="https://www.publichealth.hscni.net/publications/public-health-agency-self-harm-symposium-conference-report">https://www.publichealth.hscni.net/publications/public-health-agency-self-harm-symposium-conference-report</a>                                                                 |
| 3 | Improving the lives of people who self harm                                                        | <a href="https://www.publichealth.hscni.net/publications/improving-lives-people-who-self-harm">https://www.publichealth.hscni.net/publications/improving-lives-people-who-self-harm</a>                                                                                                             |
| 4 | What happens in the Emergency Department, a patient’s guide                                        | <a href="https://www.publichealth.hscni.net/publications/what-happens-emergency-department-patient%E2%80%99s-guide">https://www.publichealth.hscni.net/publications/what-happens-emergency-department-patient%E2%80%99s-guide</a>                                                                   |
| 5 | Evaluation of Pilot One Stop Shop Programme                                                        | <a href="https://www.publichealth.hscni.net/publications/evaluation-pilot-one-stop-shop-programme">https://www.publichealth.hscni.net/publications/evaluation-pilot-one-stop-shop-programme</a>                                                                                                     |
| 6 | NI Registry of Self-Harm Annual Report 2012/2013                                                   | <a href="https://www.publichealth.hscni.net/publications/ni-registry-self-harm-annual-report-201213">https://www.publichealth.hscni.net/publications/ni-registry-self-harm-annual-report-201213</a>                                                                                                 |
| 7 | Northern Ireland of Self-Harm Western Area Six Year Summary Report 2007-2012                       | <a href="https://www.publichealth.hscni.net/publications/northern-ireland-registry-self-harm-western-area-six-year-summary-report-2007%E2%80%932012">https://www.publichealth.hscni.net/publications/northern-ireland-registry-self-harm-western-area-six-year-summary-report-2007%E2%80%932012</a> |
| 8 | Northern Ireland Registry of Self-Harm Annual Report 2017-2018                                     | <a href="https://www.publichealth.hscni.net/publications/northern-ireland-registry-self-harm-annual-report-2017-2018">https://www.publichealth.hscni.net/publications/northern-ireland-registry-self-harm-annual-report-2017-2018</a>                                                               |
| 9 | Community Based Psychological Intervention and Support Services for People who Self-harm including | <a href="https://www.publichealth.hscni.net/contracts/tenders/community-based-psychological-intervention-and-support-services-people-who-self-ha">https://www.publichealth.hscni.net/contracts/tenders/community-based-psychological-intervention-and-support-services-people-who-self-ha</a>       |

|    |                                                            |                                                                                                                                                                                                         |
|----|------------------------------------------------------------|---------------------------------------------------------------------------------------------------------------------------------------------------------------------------------------------------------|
|    | provision of family/carer services                         |                                                                                                                                                                                                         |
| 10 | PHA published six year report on self-harm in western area | <a href="https://www.publichealth.hscni.net/news/pha-publishes-six-year-report-self-harm-western-area">https://www.publichealth.hscni.net/news/pha-publishes-six-year-report-self-harm-western-area</a> |
| 11 | Services available for people who self-harm                | <a href="https://www.publichealth.hscni.net/news/services-available-people-who-self-harm">https://www.publichealth.hscni.net/news/services-available-people-who-self-harm</a>                           |

#### 14. Royal Society for Public Health

Link: <https://www.rsph.org.uk/>

Date searched: 20/9/19

Search strategy:

- Website browsed
- Individually searched “self harm”, “self injury”, “parasuicide”, “self injurious behaviour”, “deliberate self harm”, “self cutting” and “self poisoning” in main search bar

Total hits = 147, of which 74 were duplicates

Results which met eligibility criteria for full-text inclusion:

| # | Webpage Name                                        | Link                                                                                                                                                                                                                  |
|---|-----------------------------------------------------|-----------------------------------------------------------------------------------------------------------------------------------------------------------------------------------------------------------------------|
| 1 | Looking after your self-ie                          | <a href="https://www.rsph.org.uk/our-services/e-learning/courses/free-courses/looking-after-your-selfie.html">https://www.rsph.org.uk/our-services/e-learning/courses/free-courses/looking-after-your-selfie.html</a> |
| 2 | Guest blog: self-care for all                       | <a href="https://www.rsph.org.uk/about-us/news/guest-blog-self-care-for-all.html">https://www.rsph.org.uk/about-us/news/guest-blog-self-care-for-all.html</a>                                                         |
| 3 | Guest blog: self-care – everyone’s default setting? | <a href="https://www.rsph.org.uk/about-us/news/guest-blog-self-care-everyone-s-default-setting.html">https://www.rsph.org.uk/about-us/news/guest-blog-self-care-everyone-s-default-setting.html</a>                   |

#### 15. Centre for Mental Health

Link: <https://www.centreformentalhealth.org.uk/>

Date searched: 20/9/19

Search strategy:

- Website browsed
- Individually searched “self harm”, “self-harm”, “self injury”, “parasuicide”, “self cutting”, “self poisoning”, “deliberate self harm” and “self injurious behaviour” in main search bar

Total hits = 30, of which 0 were duplicates

Results which met eligibility criteria for full-text inclusion:

| # | Webpage Name                                                                                                                     | Link                                                                                                                                                                                                                |
|---|----------------------------------------------------------------------------------------------------------------------------------|---------------------------------------------------------------------------------------------------------------------------------------------------------------------------------------------------------------------|
| 1 | NHS and local authorities should invest in support for young people who self-harm, says Centre for Mental Health report          | <a href="https://www.centreformentalhealth.org.uk/news/invest-young-people-self-harm">https://www.centreformentalhealth.org.uk/news/invest-young-people-self-harm</a>                                               |
| 2 | A space to talk                                                                                                                  | <a href="https://www.centreformentalhealth.org.uk/a-space-to-talk">https://www.centreformentalhealth.org.uk/a-space-to-talk</a>                                                                                     |
| 3 | The children’s mental health survey and its implications                                                                         | <a href="https://www.centreformentalhealth.org.uk/blog/childrens-mental-health-survey">https://www.centreformentalhealth.org.uk/blog/childrens-mental-health-survey</a>                                             |
| 4 | Therapy dogs should be more widely available in prisons to improve wellbeing and self-harm, says Centre for Mental Health report | <a href="https://www.centreformentalhealth.org.uk/news/therapy-dogs-should-be-more-widely-available-prisons">https://www.centreformentalhealth.org.uk/news/therapy-dogs-should-be-more-widely-available-prisons</a> |

|   |                                                            |                                                                                                                                                                                                                                                               |
|---|------------------------------------------------------------|---------------------------------------------------------------------------------------------------------------------------------------------------------------------------------------------------------------------------------------------------------------|
| 5 | Bringing mums' minds from darkness to light: Sadia's story | <a href="https://www.centreformentalhealth.org.uk/blog/centre-mental-health-blog/bringing-mums-minds-darkness-light-sadias-story">https://www.centreformentalhealth.org.uk/blog/centre-mental-health-blog/bringing-mums-minds-darkness-light-sadias-story</a> |
| 6 | Investing in children's mental health                      | <a href="https://www.centreformentalhealth.org.uk/publications/investing-in-childrens-mental-health">https://www.centreformentalhealth.org.uk/publications/investing-in-childrens-mental-health</a>                                                           |
| 7 | Can social media help young people's emotional wellbeing?  | <a href="https://www.centreformentalhealth.org.uk/blog/centre-mental-health-blog/social-media-young-peoples-wellbeing">https://www.centreformentalhealth.org.uk/blog/centre-mental-health-blog/social-media-young-peoples-wellbeing</a>                       |

#### 16. British Association for Behavioural and Cognitive Psychotherapies

Link: <https://www.babcp.com/Default.aspx>

Date searched: 20/8/19

Search strategy:

- Website browsed
- No search bar identified

Total hits = 0

#### 17. British Association for Counselling and Psychotherapy

Link: <https://www.bacp.co.uk/>

Date searched: 20/8/19

Search strategy:

- Website browsed
- Individually searched "self harm", "self injury", "parasuicide", "self cutting", "self poisoning", "deliberate self harm" and "self injurious behaviour" in main search bar, filtered to only show 'articles' and 'guidance', excluded member-only content

Total hits = 62, of which 3 were duplicates

Results which met eligibility criteria for full-text inclusion:

| # | Webpage Name                                                                             | Link                                                                                                                                                                                                                                                                                                        |
|---|------------------------------------------------------------------------------------------|-------------------------------------------------------------------------------------------------------------------------------------------------------------------------------------------------------------------------------------------------------------------------------------------------------------|
| 1 | Busting the myths and misconceptions about self-harm                                     | <a href="https://www.bacp.co.uk/news/news-from-bacp/2019/1-march-busting-the-myths-and-misconceptions-about-self-harm/">https://www.bacp.co.uk/news/news-from-bacp/2019/1-march-busting-the-myths-and-misconceptions-about-self-harm/</a>                                                                   |
| 2 | "Worrying" new figures show more than half of people who self-harm do not access support | <a href="https://www.bacp.co.uk/news/news-from-bacp/2019/5-june-worrying-new-figures-show-more-than-half-of-people-who-self-harm-do-not-access-support/">https://www.bacp.co.uk/news/news-from-bacp/2019/5-june-worrying-new-figures-show-more-than-half-of-people-who-self-harm-do-not-access-support/</a> |
| 3 | Bringing the 'self' into self-harm                                                       | <a href="https://www.bacp.co.uk/bacp-journals/university-and-college-counselling/november-2014/bringing-the-self-into-self-harm/">https://www.bacp.co.uk/bacp-journals/university-and-college-counselling/november-2014/bringing-the-self-into-self-harm/</a>                                               |
| 4 | Sticky bubbles, stats and Snap                                                           | <a href="https://www.bacp.co.uk/bacp-journals/bacp-children-young-people-and-families-journal/september-2013/sticky-bubbles-stats-and-snap/">https://www.bacp.co.uk/bacp-journals/bacp-children-young-people-and-families-journal/september-2013/sticky-bubbles-stats-and-snap/</a>                         |
| 5 | 'Counselling has helped me find out who I am – and be comfortable in my own skin'        | <a href="https://www.bacp.co.uk/news/news-from-bacp/2019/16-may-counselling-has-helped-me-find-out-who-i-am-and-be-comfortable-in-my-own-skin/">https://www.bacp.co.uk/news/news-from-bacp/2019/16-may-counselling-has-helped-me-find-out-who-i-am-and-be-comfortable-in-my-own-skin/</a>                   |
| 6 | Suicide and self harm: psychological therapies, prevention and risk factors              | <a href="https://www.bacp.co.uk/media/2128/bacp-suicide-self-harm-briefing-oct15.pdf">https://www.bacp.co.uk/media/2128/bacp-suicide-self-harm-briefing-oct15.pdf</a>                                                                                                                                       |
| 7 | What therapy can help with                                                               | <a href="https://www.bacp.co.uk/about-therapy/what-therapy-can-help-with/">https://www.bacp.co.uk/about-therapy/what-therapy-can-help-with/</a>                                                                                                                                                             |

#### 18. UK Council for Psychotherapy

Link: <https://www.psychotherapy.org.uk/>

Date searched: 20/8/19

Search strategy:

- Website browsed
- Individually searched “self harm”, “self injury”, “parasuicide”, “self injurious behaviour”, “deliberate self harm”, “self cutting” and “self poisoning” in main search bar

Total hits = 13, of which 3 were duplicates

Results which met eligibility criteria for full-text inclusion:

| # | Webpage Name                                                                                | Link                                                                                                                                                                                                                                                                                    |
|---|---------------------------------------------------------------------------------------------|-----------------------------------------------------------------------------------------------------------------------------------------------------------------------------------------------------------------------------------------------------------------------------------------|
| 1 | One in six children report self-harming by age 14                                           | <a href="https://www.psychotherapy.org.uk/ukcp-news/midweek-mindset/1-in-6-children-report-self-harming-by-age-14/">https://www.psychotherapy.org.uk/ukcp-news/midweek-mindset/1-in-6-children-report-self-harming-by-age-14/</a>                                                       |
| 2 | Millennial mind set: Bristol University students protest the ‘growing mental health crisis’ | <a href="https://www.psychotherapy.org.uk/ukcp-news/millennial-mindset/bristol-university-students-protest-the-growing-mental-health-crisis/">https://www.psychotherapy.org.uk/ukcp-news/millennial-mindset/bristol-university-students-protest-the-growing-mental-health-crisis/</a>   |
| 3 | Official NHS data reveals rise in mental health issues among children                       | <a href="https://www.psychotherapy.org.uk/ukcp-news/millennial-mindset/official-nhs-data-reveals-rise-in-mental-health-issues-among-children/">https://www.psychotherapy.org.uk/ukcp-news/millennial-mindset/official-nhs-data-reveals-rise-in-mental-health-issues-among-children/</a> |
| 4 | Referrals to children and adolescent services up by 26%                                     | <a href="https://www.psychotherapy.org.uk/ukcp-news/midweek-mindset/referrals-to-children-and-adolescent-services-up-by-26/">https://www.psychotherapy.org.uk/ukcp-news/midweek-mindset/referrals-to-children-and-adolescent-services-up-by-26/</a>                                     |

19. British Psychological Society

Link: <https://www.bps.org.uk/>

Date searched: 18/9/19

Search strategy:

- Website browsed
- Individually searched “self harm”, “self injury”, “parasuicide”, “self injurious behaviour”, “deliberate self harm”, “self cutting” and “self poisoning” in main search bar

Total hits = 4,718

- Due to high volume of results and decreasing relevance, only the first 100 search results for each search term were screened

Modified hits = 141, of which 16 were duplicates

Results which met eligibility criteria for full-text inclusion:

| # | Webpage Name                                                                                     | Link                                                                                                                                                                                                                                                                  |
|---|--------------------------------------------------------------------------------------------------|-----------------------------------------------------------------------------------------------------------------------------------------------------------------------------------------------------------------------------------------------------------------------|
| 1 | BPS responds to media reports on self-harming by teenage girls and its links to social media use | <a href="https://www.bps.org.uk/news-and-policy/bps-responds-media-reports-self-harming-teenage-girls-and-its-links-social-media-use">https://www.bps.org.uk/news-and-policy/bps-responds-media-reports-self-harming-teenage-girls-and-its-links-social-media-use</a> |
| 2 | BPS endorses new competence frameworks for the care of people at risk of self-harm and suicide   | <a href="https://www.bps.org.uk/news-and-policy/bps-endorses-new-competence-frameworks-care-people-risk-self-harm-and-suicide">https://www.bps.org.uk/news-and-policy/bps-endorses-new-competence-frameworks-care-people-risk-self-harm-and-suicide</a>               |
| 3 | Family support in self-harming                                                                   | <a href="https://www.bps.org.uk/news-and-policy/family-support-self-harming">https://www.bps.org.uk/news-and-policy/family-support-self-harming</a>                                                                                                                   |
| 4 | A-Z psychology                                                                                   | <a href="https://www.bps.org.uk/public/a-z-of-psychology">https://www.bps.org.uk/public/a-z-of-psychology</a>                                                                                                                                                         |

20. Samaritans

Link: <https://www.samaritans.org/>

Date searched: 29/8/19

Search strategy:

- Website browsed

- Individually searched “self harm”, “self injury”, “parasuicide”, “self injurious behaviour”, “deliberate self harm”, “self cutting” and “self poisoning” in main search bar

Total hits = 96, of which 7 were duplicates

Results which met eligibility criteria for full-text inclusion:

| # | Webpage Name                         | Link                                                                                                                                                                                                                                                                                                                                                      |
|---|--------------------------------------|-----------------------------------------------------------------------------------------------------------------------------------------------------------------------------------------------------------------------------------------------------------------------------------------------------------------------------------------------------------|
| 1 | Self-harm – Samaritans offer support | <a href="https://www.samaritans.org/branches/ballymena/samaritans-ballymena-news/self-harm-samaritans-offer-support/">https://www.samaritans.org/branches/ballymena/samaritans-ballymena-news/self-harm-samaritans-offer-support/</a>                                                                                                                     |
| 2 | DEAL: self-harm myths and facts      | <a href="https://www.samaritans.org/how-we-can-help/schools/deal/deal-resources/dealing-feelings/self-harm-myths-and-facts/">https://www.samaritans.org/how-we-can-help/schools/deal/deal-resources/dealing-feelings/self-harm-myths-and-facts/</a>                                                                                                       |
| 3 | Practical ways to help yourself cope | <a href="https://www.samaritans.org/how-we-can-help/support-and-information/if-youre-having-difficult-time/signs-you-may-be-struggling-cope/practical-ways-help-yourself-cope/">https://www.samaritans.org/how-we-can-help/support-and-information/if-youre-having-difficult-time/signs-you-may-be-struggling-cope/practical-ways-help-yourself-cope/</a> |

## 21. SANE

Link: <http://www.sane.org.uk/home>

Date searched: 29/8/19

Search strategy:

- Website browsed (1 hit)
- Individually searched “self harm”, “self injury”, “parasuicide”, “self injurious behaviour”, “deliberate self harm”, “self cutting” and “self poisoning” in main search bar

Total hits = 3, of which 0 were duplicates

Results which met eligibility criteria for full-text inclusion:

| # | Webpage Name       | Link                                                                                                        |
|---|--------------------|-------------------------------------------------------------------------------------------------------------|
| 1 | Self harm          | <a href="http://www.sane.org.uk/uploads/Self_Harm-1.pdf">http://www.sane.org.uk/uploads/Self_Harm-1.pdf</a> |
| 2 | Self harm research | <a href="http://www.sane.org.uk/resources/self_harm/">http://www.sane.org.uk/resources/self_harm/</a>       |

## 22. CALM

Link: <https://www.thecalmzone.net/>

Date searched: 29/8/19

Search strategy:

- Website browsed (1 hit)
- Individually searched “self harm”, “self injury”, “parasuicide”, “self injurious behaviour”, “deliberate self harm”, “self cutting” and “self poisoning” in main search bar

Total hits = 22, of which 1 was a duplicate

Results which met eligibility criteria for full-text inclusion:

| # | Webpage Name                | Link                                                                                                                                                                                      |
|---|-----------------------------|-------------------------------------------------------------------------------------------------------------------------------------------------------------------------------------------|
| 1 | Self harm                   | <a href="https://www.thecalmzone.net/help/get-help/self-harm/">https://www.thecalmzone.net/help/get-help/self-harm/</a>                                                                   |
| 2 | Self harm and short sleeves | <a href="https://www.thecalmzone.net/2013/08/selfharmshortsleeves/?highlight=%22self%20harm%22">https://www.thecalmzone.net/2013/08/selfharmshortsleeves/?highlight=%22self%20harm%22</a> |

## 23. Childline

Link: <https://www.childline.org.uk/>

Date searched: 29/8/19

Search strategy:

- Website browsed (4 hits)
- Individually searched “self harm”, “self injury”, “parasuicide”, “self injurious behaviour”, “deliberate self harm”, “self cutting” and “self poisoning” in main search bar, filtered to show ‘content listings’, ‘articles’ and ‘explore’

Total hits = 25, of which 4 were duplicates

Results which met eligibility criteria for full-text inclusion:

| # | Webpage Name                  | Link                                                                                                                                                                                                            |
|---|-------------------------------|-----------------------------------------------------------------------------------------------------------------------------------------------------------------------------------------------------------------|
| 1 | Self harm coping techniques   | <a href="https://www.childline.org.uk/info-advice/your-feelings/self-harm/self-harm-coping-techniques/">https://www.childline.org.uk/info-advice/your-feelings/self-harm/self-harm-coping-techniques/</a>       |
| 2 | Self harm                     | <a href="https://www.childline.org.uk/info-advice/your-feelings/self-harm/self-harm/">https://www.childline.org.uk/info-advice/your-feelings/self-harm/self-harm/</a>                                           |
| 3 | Advice about helping a friend | <a href="https://www.childline.org.uk/info-advice/friends-relationships-sex/friends/helping-friend/">https://www.childline.org.uk/info-advice/friends-relationships-sex/friends/helping-friend/</a>             |
| 4 | Coping with stress            | <a href="https://www.childline.org.uk/info-advice/your-feelings/anxiety-stress-panic/coping-with-stress/">https://www.childline.org.uk/info-advice/your-feelings/anxiety-stress-panic/coping-with-stress/</a>   |
| 5 | Helena’s story                | <a href="https://www.childline.org.uk/get-involved/real-life-stories/self-harm-helenas-story/">https://www.childline.org.uk/get-involved/real-life-stories/self-harm-helenas-story/</a>                         |
| 6 | Trauma: Adam’s story          | <a href="https://www.childline.org.uk/get-involved/real-life-stories/trauma-adams-story/">https://www.childline.org.uk/get-involved/real-life-stories/trauma-adams-story/</a>                                   |
| 7 | Depression and feeling sad    | <a href="https://www.childline.org.uk/info-advice/your-feelings/feelings-emotions/depression-feeling-sad/">https://www.childline.org.uk/info-advice/your-feelings/feelings-emotions/depression-feeling-sad/</a> |

#### 24. SelfHarmUK

Link: <https://www.selfharm.co.uk/>

Date searched: 2/9/19

Search strategy:

- Website browsed (20 hits)
- Individually searched “self harm”, “self injury”, “parasuicide”, “self injurious behaviour”, “deliberate self harm”, “self cutting” and “self poisoning” in main search bar

Total hits = 133, of which 23 were duplicates

Results which met eligibility criteria for full-text inclusion:

| #  | Webpage Name                             | Link                                                                                                                                                                                                    |
|----|------------------------------------------|---------------------------------------------------------------------------------------------------------------------------------------------------------------------------------------------------------|
| 1  | What is self-harm?                       | <a href="https://www.selfharm.co.uk/get-information/the-facts/what-is-self-harm">https://www.selfharm.co.uk/get-information/the-facts/what-is-self-harm</a>                                             |
| 2  | Who self-harms?                          | <a href="https://www.selfharm.co.uk/get-information/the-facts/who-self-harms">https://www.selfharm.co.uk/get-information/the-facts/who-self-harms</a>                                                   |
| 3  | Self harm statistics                     | <a href="https://www.selfharm.co.uk/get-information/the-facts/self-harm-statistics">https://www.selfharm.co.uk/get-information/the-facts/self-harm-statistics</a>                                       |
| 4  | Recovering from self-harm                | <a href="https://www.selfharm.co.uk/get-information/the-facts/recovering-from-self-harm">https://www.selfharm.co.uk/get-information/the-facts/recovering-from-self-harm</a>                             |
| 5  | Dealing with scars                       | <a href="https://www.selfharm.co.uk/get-information/the-facts/dealing-with-scars">https://www.selfharm.co.uk/get-information/the-facts/dealing-with-scars</a>                                           |
| 6  | Disclosure: sharing stories of self-harm | <a href="https://www.selfharm.co.uk/get-information/the-facts/disclosure-sharing-stories-of-self-harm">https://www.selfharm.co.uk/get-information/the-facts/disclosure-sharing-stories-of-self-harm</a> |
| 7  | Autism and self-harm                     | <a href="https://www.selfharm.co.uk/get-information/the-facts/autism-and-self-harm">https://www.selfharm.co.uk/get-information/the-facts/autism-and-self-harm</a>                                       |
| 8  | Eating disorders and self-harm           | <a href="https://www.selfharm.co.uk/get-information/the-facts/eating-disorders-and-self-harm">https://www.selfharm.co.uk/get-information/the-facts/eating-disorders-and-self-harm</a>                   |
| 9  | Boys and self-harm                       | <a href="https://www.selfharm.co.uk/get-information/the-facts/boys-and-self-harm">https://www.selfharm.co.uk/get-information/the-facts/boys-and-self-harm</a>                                           |
| 10 | Self-harm in LGBTQI young people         | <a href="https://www.selfharm.co.uk/get-information/the-facts/self-harm-in-lgbtqi-young-people">https://www.selfharm.co.uk/get-information/the-facts/self-harm-in-lgbtqi-young-people</a>               |

|    |                                                                     |                                                                                                                                                                                             |
|----|---------------------------------------------------------------------|---------------------------------------------------------------------------------------------------------------------------------------------------------------------------------------------|
| 11 | SEN and self-harm                                                   | <a href="https://www.selfharm.co.uk/get-information/the-facts/sen-and-self-harm">https://www.selfharm.co.uk/get-information/the-facts/sen-and-self-harm</a>                                 |
| 12 | They must enjoy it                                                  | <a href="https://www.selfharm.co.uk/get-information/the-myths/they-must-enjoy-it">https://www.selfharm.co.uk/get-information/the-myths/they-must-enjoy-it</a>                               |
| 13 | Self-harmers must be mentally ill                                   | <a href="https://www.selfharm.co.uk/get-information/the-myths/self-harmers-must-be-mentally-ill">https://www.selfharm.co.uk/get-information/the-myths/self-harmers-must-be-mentally-ill</a> |
| 14 | Self-harm and suicide                                               | <a href="https://www.selfharm.co.uk/get-information/the-myths/self-harm-and-suicide">https://www.selfharm.co.uk/get-information/the-myths/self-harm-and-suicide</a>                         |
| 15 | Attention, please                                                   | <a href="https://www.selfharm.co.uk/get-information/the-myths/attention-please">https://www.selfharm.co.uk/get-information/the-myths/attention-please</a>                                   |
| 16 | It's all the internet's fault                                       | <a href="https://www.selfharm.co.uk/get-information/the-myths/its-all-the-internets-fault">https://www.selfharm.co.uk/get-information/the-myths/its-all-the-internets-fault</a>             |
| 17 | Knowing your body                                                   | <a href="https://www.selfharm.co.uk/get-information/staying-safe/knowning-your-body">https://www.selfharm.co.uk/get-information/staying-safe/knowning-your-body</a>                         |
| 18 | Harm minimisation                                                   | <a href="https://www.selfharm.co.uk/get-information/staying-safe/harm-minimisation">https://www.selfharm.co.uk/get-information/staying-safe/harm-minimisation</a>                           |
| 19 | Poisoning                                                           | <a href="https://www.selfharm.co.uk/get-information/staying-safe/poisoning">https://www.selfharm.co.uk/get-information/staying-safe/poisoning</a>                                           |
| 20 | Looking after you                                                   | <a href="https://www.selfharm.co.uk/get-information/staying-safe/looking-after-you">https://www.selfharm.co.uk/get-information/staying-safe/looking-after-you</a>                           |
| 21 | Self-harm triggers                                                  | <a href="https://www.selfharm.co.uk/blog/self-harm-triggers">https://www.selfharm.co.uk/blog/self-harm-triggers</a>                                                                         |
| 22 | Living with self-harm                                               | <a href="https://www.selfharm.co.uk/blog/living-with-self-harm">https://www.selfharm.co.uk/blog/living-with-self-harm</a>                                                                   |
| 23 | Self-harm is real                                                   | <a href="https://www.selfharm.co.uk/blog/self-harm-is-real">https://www.selfharm.co.uk/blog/self-harm-is-real</a>                                                                           |
| 24 | Kelly's battle with self-harm                                       | <a href="https://www.selfharm.co.uk/blog/kellys-battle-with-self-harm">https://www.selfharm.co.uk/blog/kellys-battle-with-self-harm</a>                                                     |
| 25 | How to get control over your self-harm                              | <a href="https://www.selfharm.co.uk/blog/how-to-get-control-over-your-self-harm">https://www.selfharm.co.uk/blog/how-to-get-control-over-your-self-harm</a>                                 |
| 26 | Will alternatives work?                                             | <a href="https://www.selfharm.co.uk/blog/will-alternatives-work">https://www.selfharm.co.uk/blog/will-alternatives-work</a>                                                                 |
| 27 | Health Habits                                                       | <a href="https://www.selfharm.co.uk/blog/healthy-habits">https://www.selfharm.co.uk/blog/healthy-habits</a>                                                                                 |
| 28 | Recovery – the Long Road and what I wish someone would have told me | <a href="https://www.selfharm.co.uk/blog/recovery-the-long-road">https://www.selfharm.co.uk/blog/recovery-the-long-road</a>                                                                 |
| 29 | Alternatives and distractions                                       | <a href="https://www.selfharm.co.uk/blog/alternatives-and-distractions">https://www.selfharm.co.uk/blog/alternatives-and-distractions</a>                                                   |
| 30 | It's better to talk                                                 | <a href="https://www.selfharm.co.uk/blog/its-better-to-talk">https://www.selfharm.co.uk/blog/its-better-to-talk</a>                                                                         |

## 25. LifeSIGNS

Link: <http://www.lifesigns.org.uk/>

Date searched: 19/9/19

Search strategy:

- Website browsed (13 hits)
- Individually searched “self harm”, “self injury”, “parasuicide”, “self injurious behaviour”, “deliberate self harm”, “self cutting” and “self poisoning” in main search bar

Total hits = 963

- Due to high volume of results and decreasing relevance, only the first 100 search results for each search term were screened

Modified hits = 222, of which 81 were duplicates

Results which met eligibility criteria for full-text inclusion:

| # | Webpage Name    | Link                                                                                                    |
|---|-----------------|---------------------------------------------------------------------------------------------------------|
| 1 | Helping you     | <a href="http://www.lifesigns.org.uk/help/">http://www.lifesigns.org.uk/help/</a>                       |
| 2 | Read this first | <a href="http://www.lifesigns.org.uk/read-this-first/">http://www.lifesigns.org.uk/read-this-first/</a> |
| 3 | HALT            | <a href="http://www.lifesigns.org.uk/halt/">http://www.lifesigns.org.uk/halt/</a>                       |
| 4 | Alternatives    | <a href="http://www.lifesigns.org.uk/alternatives/">http://www.lifesigns.org.uk/alternatives/</a>       |
| 5 | 15 minute rule  | <a href="http://www.lifesigns.org.uk/15-minutes-rule/">http://www.lifesigns.org.uk/15-minutes-rule/</a> |



|    |                                                                                    |                                                                                                                                                                                                                                                               |
|----|------------------------------------------------------------------------------------|---------------------------------------------------------------------------------------------------------------------------------------------------------------------------------------------------------------------------------------------------------------|
| 6  | Surfing the urge                                                                   | <a href="http://www.lifesigns.org.uk/surfing-the-urge/">http://www.lifesigns.org.uk/surfing-the-urge/</a>                                                                                                                                                     |
| 7  | Everything but rule                                                                | <a href="http://www.lifesigns.org.uk/everything-but-rule/">http://www.lifesigns.org.uk/everything-but-rule/</a>                                                                                                                                               |
| 8  | Distraction box                                                                    | <a href="http://www.lifesigns.org.uk/distraction-box/">http://www.lifesigns.org.uk/distraction-box/</a>                                                                                                                                                       |
| 9  | Masturbation                                                                       | <a href="http://www.lifesigns.org.uk/masturbation/">http://www.lifesigns.org.uk/masturbation/</a>                                                                                                                                                             |
| 10 | Choice                                                                             | <a href="http://www.lifesigns.org.uk/choice/">http://www.lifesigns.org.uk/choice/</a>                                                                                                                                                                         |
| 11 | Male SI                                                                            | <a href="http://www.lifesigns.org.uk/male-si/">http://www.lifesigns.org.uk/male-si/</a>                                                                                                                                                                       |
| 12 | Invalidation and criticism                                                         | <a href="http://www.lifesigns.org.uk/addressing-invalidation-criticism-feedback-and-self-criticism-with-cbt/">http://www.lifesigns.org.uk/addressing-invalidation-criticism-feedback-and-self-criticism-with-cbt/</a>                                         |
| 13 | Getting help                                                                       | <a href="http://www.lifesigns.org.uk/getting-help/">http://www.lifesigns.org.uk/getting-help/</a>                                                                                                                                                             |
| 14 | Why is it so hard to stop?                                                         | <a href="http://www.lifesigns.org.uk/why-is-it-so-hard-to-stop/">http://www.lifesigns.org.uk/why-is-it-so-hard-to-stop/</a>                                                                                                                                   |
| 15 | How to react when your friend says they self-injure                                | <a href="http://www.lifesigns.org.uk/how-to-react-when-your-friend-says-they-self-injure/">http://www.lifesigns.org.uk/how-to-react-when-your-friend-says-they-self-injure/</a>                                                                               |
| 16 | New year new you? Goals, not resolutions, will help you move away from self-injury | <a href="http://www.lifesigns.org.uk/2018/01/new-year-new-you-goals-not-resolutions-will-help-you-move-away-from-self-injury/">http://www.lifesigns.org.uk/2018/01/new-year-new-you-goals-not-resolutions-will-help-you-move-away-from-self-injury/</a>       |
| 17 | Self poisoning                                                                     | <a href="http://www.lifesigns.org.uk/2017/05/self-poisoning/">http://www.lifesigns.org.uk/2017/05/self-poisoning/</a>                                                                                                                                         |
| 18 | Drugs and self-recovery – Ben’s ongoing recovery                                   | <a href="http://www.lifesigns.org.uk/2016/07/drugs-and-self-injury-bens-on-going-recovery/">http://www.lifesigns.org.uk/2016/07/drugs-and-self-injury-bens-on-going-recovery/</a>                                                                             |
| 19 | Self-injury addiction                                                              | <a href="http://www.lifesigns.org.uk/self-injury-addiction/">http://www.lifesigns.org.uk/self-injury-addiction/</a>                                                                                                                                           |
| 20 | No harm ‘contracts’                                                                | <a href="http://www.lifesigns.org.uk/2013/04/no-harm-contracts/">http://www.lifesigns.org.uk/2013/04/no-harm-contracts/</a>                                                                                                                                   |
| 21 | Self-injury: self expression inside out – hard to stop                             | <a href="http://www.lifesigns.org.uk/2010/02/self-injury-self-expression-inside-out-hard-to-stop/">http://www.lifesigns.org.uk/2010/02/self-injury-self-expression-inside-out-hard-to-stop/</a>                                                               |
| 22 | Adult self-injury                                                                  | <a href="http://www.lifesigns.org.uk/adult-self-injury/">http://www.lifesigns.org.uk/adult-self-injury/</a>                                                                                                                                                   |
| 23 | Self-injury: the choice to cope and survive                                        | <a href="http://www.lifesigns.org.uk/2013/10/self-injury-the-choice-to-cope-and-survive/">http://www.lifesigns.org.uk/2013/10/self-injury-the-choice-to-cope-and-survive/</a>                                                                                 |
| 24 | Terrible times, self-injury and recovery – by Kaveeta                              | <a href="http://www.lifesigns.org.uk/2013/02/terrible-times-self-injury-and-recovery-by-kaveeta/">http://www.lifesigns.org.uk/2013/02/terrible-times-self-injury-and-recovery-by-kaveeta/</a>                                                                 |
| 25 | Andy’s self-injury research results summary                                        | <a href="http://www.lifesigns.org.uk/2010/06/andys-self-injury-research-results-summary/">http://www.lifesigns.org.uk/2010/06/andys-self-injury-research-results-summary/</a>                                                                                 |
| 26 | FAQs about self-injury                                                             | <a href="http://www.lifesigns.org.uk/2010/05/faqs-about-self-injury/">http://www.lifesigns.org.uk/2010/05/faqs-about-self-injury/</a>                                                                                                                         |
| 27 | Self-Injury : self expression inside out – distraction and other alternatives      | <a href="http://www.lifesigns.org.uk/2010/03/self-injury-self-expression-inside-out-distraction-and-other-alternatives/">http://www.lifesigns.org.uk/2010/03/self-injury-self-expression-inside-out-distraction-and-other-alternatives/</a>                   |
| 28 | Helping you with self-harm                                                         | <a href="http://www.lifesigns.org.uk/2014/11/helping-you-with-self-harm/">http://www.lifesigns.org.uk/2014/11/helping-you-with-self-harm/</a>                                                                                                                 |
| 29 | “You kept me from seriously harming myself tonight”                                | <a href="http://www.lifesigns.org.uk/2011/12/you-kept-me-from-seriously-harming-myself-tonight/">http://www.lifesigns.org.uk/2011/12/you-kept-me-from-seriously-harming-myself-tonight/</a>                                                                   |
| 30 | NICE consults on draft recommendations for the longer-term management of self-harm | <a href="http://www.lifesigns.org.uk/2011/04/nice-consults-on-draft-recommendations-for-the-longer-term-management-of-self-harm/">http://www.lifesigns.org.uk/2011/04/nice-consults-on-draft-recommendations-for-the-longer-term-management-of-self-harm/</a> |
| 31 | Dr Neil joins LifeSIGNS to offer psychiatric guidance to people who self-injure    | <a href="http://www.lifesigns.org.uk/2008/02/dr-neil-joins-lifesigns-to-offer-psychiatric-guidance-to-people-who-self-injure/">http://www.lifesigns.org.uk/2008/02/dr-neil-joins-lifesigns-to-offer-psychiatric-guidance-to-people-who-self-injure/</a>       |

---

## 26. Harmless

Link: <http://www.harmless.org.uk/>

Date searched: 2/9/19

Search strategy:

- Website browsed (3 hits)
- No search bar identified

Total hits = 3

Results which met eligibility criteria for full-text inclusion:

---

| # | Webpage Name | Link |
|---|--------------|------|
|---|--------------|------|

---

|   |                      |                                                                                                                                                                           |
|---|----------------------|---------------------------------------------------------------------------------------------------------------------------------------------------------------------------|
| 1 | People who self-harm | <a href="http://www.harmless.org.uk/whoWeSupport/peopleWhoSelfHarm">http://www.harmless.org.uk/whoWeSupport/peopleWhoSelfHarm</a>                                         |
| 2 | Family and friends   | <a href="http://www.harmless.org.uk/downloads/factSheet2_AdviceForFriendsAndFamily.pdf">http://www.harmless.org.uk/downloads/factSheet2_AdviceForFriendsAndFamily.pdf</a> |
| 3 | Young people         | <a href="http://www.harmless.org.uk/downloads/factSheet1_AdviceForYoungPeople.pdf">http://www.harmless.org.uk/downloads/factSheet1_AdviceForYoungPeople.pdf</a>           |

## 27. Recover Your Life

Link: <http://www.recoveryourlife.com/>

Date searched: 3/9/19

Search strategy:

- Website browsed (8 hits)
- No search bar identified

Total hits = 8

Results which met eligibility criteria for full-text inclusion:

| # | Webpage Name              | Link                                                                                                                        |
|---|---------------------------|-----------------------------------------------------------------------------------------------------------------------------|
| 1 | The underlying causes     | <a href="http://www.recoveryourlife.com/index.php?categoryid=22">http://www.recoveryourlife.com/index.php?categoryid=22</a> |
| 2 | You are not alone         | <a href="http://www.recoveryourlife.com/index.php?categoryid=23">http://www.recoveryourlife.com/index.php?categoryid=23</a> |
| 3 | Preparing to stop         | <a href="http://www.recoveryourlife.com/index.php?categoryid=64">http://www.recoveryourlife.com/index.php?categoryid=64</a> |
| 4 | Distraction advice        | <a href="http://www.recoveryourlife.com/index.php?categoryid=61">http://www.recoveryourlife.com/index.php?categoryid=61</a> |
| 5 | Seeking professional help | <a href="http://www.recoveryourlife.com/index.php?categoryid=65">http://www.recoveryourlife.com/index.php?categoryid=65</a> |
| 6 | Sticking to stopping      | <a href="http://www.recoveryourlife.com/index.php?categoryid=66">http://www.recoveryourlife.com/index.php?categoryid=66</a> |

## 28. Inspire Wellbeing

Link: <https://www.inspirewellbeing.org/>

Date searched: 3/9/19

Search strategy:

- Website browsed
- No search bar identified

Total hits = 0

## 29. Papyrus

Link: <https://papyrus-uk.org/>

Date searched: 29/8/19

Search strategies:

- Website browsed
- Individually searched “self harm”, “self injury”, “parasuicide”, “self injurious behaviour”, “deliberate self harm”, “self cutting” and “self poisoning” in main search bar

Total hits = 17, of which 2 were duplicates

Results which met eligibility criteria for full-text inclusion:

| # | Webpage Name              | Link                                                                                                              |
|---|---------------------------|-------------------------------------------------------------------------------------------------------------------|
| 1 | Self-injury Awareness Day | <a href="https://papyrus-uk.org/self-injury-awareness-day/">https://papyrus-uk.org/self-injury-awareness-day/</a> |
| 2 | Wellbeing Apps            | <a href="https://papyrus-uk.org/wellbeing-apps/">https://papyrus-uk.org/wellbeing-apps/</a>                       |

## 30. BEAT

Link: <https://www.beateatingdisorders.org.uk/>

Date searched: 4/9/19

Search strategies:

- Website browsed
- Individually searched “self -harm”, “self-injury”, “parasuicide”, “self-injurious behaviour”, “deliberate self-harm”, “self-cutting” and “self-poisoning” in main search bar (no results found without hyphons)

Total hits = 196, of which 45 were duplicates

Results which met eligibility criteria for full-text inclusion:

| #  | Webpage Name                                                    | Link                                                                                                                                                                                                                        |
|----|-----------------------------------------------------------------|-----------------------------------------------------------------------------------------------------------------------------------------------------------------------------------------------------------------------------|
| 1  | Keep pushing forward and everything will fall into place        | <a href="https://www.beateatingdisorders.org.uk/your-stories/keep-pushing-forward-everything-fall-into-place">https://www.beateatingdisorders.org.uk/your-stories/keep-pushing-forward-everything-fall-into-place</a>       |
| 2  | Overturning bad decisions and understanding appropriate ones    | <a href="https://www.beateatingdisorders.org.uk/support-services/overturning-bad-decisions">https://www.beateatingdisorders.org.uk/support-services/overturning-bad-decisions</a>                                           |
| 3  | My journey to recovery and beyond                               | <a href="https://www.beateatingdisorders.org.uk/your-stories/my-journey-to-recovery-and-beyond">https://www.beateatingdisorders.org.uk/your-stories/my-journey-to-recovery-and-beyond</a>                                   |
| 4  | Advice for recovery from someone who has been there             | <a href="https://www.beateatingdisorders.org.uk/your-stories/advice-recovery-been-there">https://www.beateatingdisorders.org.uk/your-stories/advice-recovery-been-there</a>                                                 |
| 5  | Aim for progress, not perfection                                | <a href="https://www.beateatingdisorders.org.uk/your-stories/recovery/progress-not-perfection">https://www.beateatingdisorders.org.uk/your-stories/recovery/progress-not-perfection</a>                                     |
| 6  | Recovery: it’s never too late                                   | <a href="https://www.beateatingdisorders.org.uk/your-stories/recovery/recovery-never-too-late">https://www.beateatingdisorders.org.uk/your-stories/recovery/recovery-never-too-late</a>                                     |
| 7  | To recover, I needed to be okay with being me                   | <a href="https://www.beateatingdisorders.org.uk/your-stories/to-recover-needed-okay-with-me">https://www.beateatingdisorders.org.uk/your-stories/to-recover-needed-okay-with-me</a>                                         |
| 8  | Honour your body for all it does for you                        | <a href="https://www.beateatingdisorders.org.uk/your-stories/honour-your-body-for-all-it-does-for-you">https://www.beateatingdisorders.org.uk/your-stories/honour-your-body-for-all-it-does-for-you</a>                     |
| 9  | Why the journey to recovery is just as important as the outcome | <a href="https://www.beateatingdisorders.org.uk/your-stories/why-journey-recovery-important-outcome">https://www.beateatingdisorders.org.uk/your-stories/why-journey-recovery-important-outcome</a>                         |
| 10 | When does recovery become recovered?                            | <a href="https://www.beateatingdisorders.org.uk/your-stories/when-does-recovery-become-recovered">https://www.beateatingdisorders.org.uk/your-stories/when-does-recovery-become-recovered</a>                               |
| 11 | From eating disorders and self-harm to health and happiness     | <a href="https://www.beateatingdisorders.org.uk/your-stories/from-eating-disorders-self-harm-health-happiness">https://www.beateatingdisorders.org.uk/your-stories/from-eating-disorders-self-harm-health-happiness</a>     |
| 12 | I decided to stop with the denial and start my path to recovery | <a href="https://www.beateatingdisorders.org.uk/your-stories/recovery/stop-denial-start-recovery">https://www.beateatingdisorders.org.uk/your-stories/recovery/stop-denial-start-recovery</a>                               |
| 13 | From surviving to thriving: 5 years on                          | <a href="https://www.beateatingdisorders.org.uk/your-stories/recovery/surviving-thriving-five-years-on">https://www.beateatingdisorders.org.uk/your-stories/recovery/surviving-thriving-five-years-on</a>                   |
| 14 | Real, raw, recovery... It’s all about the little things         | <a href="https://www.beateatingdisorders.org.uk/your-stories/recovery/real-raw-recovery-its-about-little-things">https://www.beateatingdisorders.org.uk/your-stories/recovery/real-raw-recovery-its-about-little-things</a> |
| 15 | My fight for recovery                                           | <a href="https://www.beateatingdisorders.org.uk/your-stories/anorexia/my-fight-for-recovery">https://www.beateatingdisorders.org.uk/your-stories/anorexia/my-fight-for-recovery</a>                                         |
| 16 | Recovery information                                            | <a href="https://www.beateatingdisorders.org.uk/recovery-information">https://www.beateatingdisorders.org.uk/recovery-information</a>                                                                                       |

### 31. Rethink Mental Illness

Link: <https://www.rethink.org>

Date searched: 4/9/19

Search strategy:

- Website browsed (1 hit)
- Individually searched “self harm”, “self injury”, “parasuicide”, “self injurious behaviour”, “deliberate self harm”, “self cutting” and “self poisoning” in main search bar

Total hits = 305, of which 252 were duplicates

Results which met eligibility criteria for full-text inclusion:

| # | Webpage Name                                  | Link                                                                                                                                                                                                                                                                                                                                                                                    |
|---|-----------------------------------------------|-----------------------------------------------------------------------------------------------------------------------------------------------------------------------------------------------------------------------------------------------------------------------------------------------------------------------------------------------------------------------------------------|
| 1 | Prisoners and self harm                       | <a href="https://www.rethink.org/advice-and-information/rights-restrictions/police-courts-and-prison/prisoners-and-self-harm/">https://www.rethink.org/advice-and-information/rights-restrictions/police-courts-and-prison/prisoners-and-self-harm/</a>                                                                                                                                 |
| 2 | Therapy dogs should be more widely available  | <a href="https://www.rethink.org/news-and-stories/news/2018/dec/therapy-dogs-should-be-more-widely-available-in-prisons-to-improve-wellbeing-and-self-harm-says-new-report/">https://www.rethink.org/news-and-stories/news/2018/dec/therapy-dogs-should-be-more-widely-available-in-prisons-to-improve-wellbeing-and-self-harm-says-new-report/</a>                                     |
| 3 | Largest survey of its kind...                 | <a href="https://www.rethink.org/news-and-stories/news/2019/mar/largest-survey-of-its-kind-reveals-extent-of-university-students-struggles-with-thoughts-of-self-harm-loneliness-and-anxiety/">https://www.rethink.org/news-and-stories/news/2019/mar/largest-survey-of-its-kind-reveals-extent-of-university-students-struggles-with-thoughts-of-self-harm-loneliness-and-anxiety/</a> |
| 4 | Today marks one year since I last self-harmed | <a href="https://www.rethink.org/news-and-stories/blogs/2018/dec/today-marks-one-year-since-i-last-self-harmed/">https://www.rethink.org/news-and-stories/blogs/2018/dec/today-marks-one-year-since-i-last-self-harmed/</a>                                                                                                                                                             |

### 32. Mind

Link: <https://www.mind.org.uk/>

Date searched: 29/8/19

Search strategy:

- Website browsed
- Individually searched “self harm”, “self injury”, “parasuicide”, “self injurious behaviour”, “deliberate self harm”, “self cutting” and “self poisoning” in main search bar

Total hits = 110, of which 4 were duplicates

Results which met eligibility criteria for full-text inclusion:

| #  | Webpage Name                    | Link                                                                                                                                                                                                                                                                                                                                  |
|----|---------------------------------|---------------------------------------------------------------------------------------------------------------------------------------------------------------------------------------------------------------------------------------------------------------------------------------------------------------------------------------|
| 1  | Self-harm                       | <a href="https://www.mind.org.uk/information-support/types-of-mental-health-problems/self-harm/#.XWeLDC5KiUk">https://www.mind.org.uk/information-support/types-of-mental-health-problems/self-harm/#.XWeLDC5KiUk</a>                                                                                                                 |
| 2  | Helping yourself now            | <a href="https://www.mind.org.uk/information-support/types-of-mental-health-problems/self-harm/helping-yourself-now/#.XWeLXy5KiUk">https://www.mind.org.uk/information-support/types-of-mental-health-problems/self-harm/helping-yourself-now/#.XWeLXy5KiUk</a> (29/8/19)                                                             |
| 3  | Why people self harm            | <a href="https://www.mind.org.uk/information-support/types-of-mental-health-problems/self-harm/why-people-self-harm/#.XWeLfy5KiUk">https://www.mind.org.uk/information-support/types-of-mental-health-problems/self-harm/why-people-self-harm/#.XWeLfy5KiUk</a>                                                                       |
| 4  | For friends and family          | <a href="https://www.mind.org.uk/information-support/types-of-mental-health-problems/self-harm/for-friends-and-family/#.XWeLny5KiUk">https://www.mind.org.uk/information-support/types-of-mental-health-problems/self-harm/for-friends-and-family/#.XWeLny5KiUk</a>                                                                   |
| 5  | Treatment and support           | <a href="https://www.mind.org.uk/information-support/types-of-mental-health-problems/self-harm/treatment-and-support/#.XWeLxC5KiUk">https://www.mind.org.uk/information-support/types-of-mental-health-problems/self-harm/treatment-and-support/#.XWeLxC5KiUk</a>                                                                     |
| 6  | Helping yourself long-term      | <a href="https://www.mind.org.uk/information-support/types-of-mental-health-problems/self-harm/helping-yourself-long-term/#.XWeMhS5KiUk">https://www.mind.org.uk/information-support/types-of-mental-health-problems/self-harm/helping-yourself-long-term/#.XWeMhS5KiUk</a>                                                           |
| 7  | Self-care for BPD               | <a href="https://www.mind.org.uk/information-support/types-of-mental-health-problems/borderline-personality-disorder-bpd/self-care-for-bpd/#.XWeMqS5KiUk">https://www.mind.org.uk/information-support/types-of-mental-health-problems/borderline-personality-disorder-bpd/self-care-for-bpd/#.XWeMqS5KiUk</a>                         |
| 8  | Self-care                       | <a href="https://www.mind.org.uk/information-support/types-of-mental-health-problems/personality-disorders/self-care/#.XWeNky5KiUk">https://www.mind.org.uk/information-support/types-of-mental-health-problems/personality-disorders/self-care/#.XWeNky5KiUk</a>                                                                     |
| 9  | Dialectical behaviour therapy   | <a href="https://www.mind.org.uk/information-support/drugs-and-treatments/dialectical-behaviour-therapy-dbt/#.XWeNvi5KiUk">https://www.mind.org.uk/information-support/drugs-and-treatments/dialectical-behaviour-therapy-dbt/#.XWeNvi5KiUk</a>                                                                                       |
| 10 | Difficult feelings & behaviours | <a href="https://www.mind.org.uk/information-support/types-of-mental-health-problems/mental-health-problems-introduction/difficult-feelings-behaviours/#.XWeOEi5KiUk">https://www.mind.org.uk/information-support/types-of-mental-health-problems/mental-health-problems-introduction/difficult-feelings-behaviours/#.XWeOEi5KiUk</a> |
| 11 | Treatment and support (BPD)     | <a href="https://www.mind.org.uk/information-support/types-of-mental-health-problems/borderline-personality-disorder-bpd/treatment-and-support/#.XWePGy5KiUk">https://www.mind.org.uk/information-support/types-of-mental-health-problems/borderline-personality-disorder-bpd/treatment-and-support/#.XWePGy5KiUk</a>                 |
| 12 | Treatments (depression)         | <a href="https://www.mind.org.uk/information-support/types-of-mental-health-problems/depression/treatments/#.XWePfs5KiUk">https://www.mind.org.uk/information-support/types-of-mental-health-problems/depression/treatments/#.XWePfs5KiUk</a>                                                                                         |

13 Resilience <https://www.mind.org.uk/information-support/police/mental-wellbeing-police/resilience/#.XWeP7C5KiUk>

### 33. Battle Scars

Link: <https://www.battle-scars-self-harm.org.uk/>

Date searched: 21/8/19

Search strategy:

- Website browsed
- Individually searched “self harm”, “self injury”, “parasuicide”, “self injurious behaviour”, “deliberate self harm”, “self cutting” and “self poisoning” in main search bar

Total hits = 28, of which 0 were duplicates

Results which met eligibility criteria for full-text inclusion:

| # | Webpage Name                 | Link                                                                                                                                                                |
|---|------------------------------|---------------------------------------------------------------------------------------------------------------------------------------------------------------------|
| 1 | What is self-harm all about? | <a href="https://www.battle-scars-self-harm.org.uk/what-is-self-harm-all-about.html">https://www.battle-scars-self-harm.org.uk/what-is-self-harm-all-about.html</a> |

### 34. Mental Health Matters

Link: <https://www.mhm.org.uk/>

Date searched: 4/9/19

Search strategy:

- Website browsed
- Individually searched “self harm”, “self injury”, “parasuicide”, “self injurious behaviour”, “deliberate self harm”, “self cutting” and “self poisoning” in main search bar

Total hits = 389, of which 314 were duplicates

Results which met eligibility criteria for full-text inclusion:

| # | Webpage Name              | Link                                                                                                                                                    |
|---|---------------------------|---------------------------------------------------------------------------------------------------------------------------------------------------------|
| 1 | What is CBT?              | <a href="https://www.mhm.org.uk/what-is-cognitive-behavioural-therapy-cbt">https://www.mhm.org.uk/what-is-cognitive-behavioural-therapy-cbt</a>         |
| 2 | Self-injury awareness day | <a href="https://www.mhm.org.uk/News/self-injury-awareness-day-1st-march-2019">https://www.mhm.org.uk/News/self-injury-awareness-day-1st-march-2019</a> |
| 3 | Boosting self-esteem      | <a href="https://www.mhm.org.uk/Blog/boosting-self-esteem">https://www.mhm.org.uk/Blog/boosting-self-esteem</a>                                         |
| 4 | Spotting the signs        | <a href="https://www.mhm.org.uk/Blog/spotting-the-signs">https://www.mhm.org.uk/Blog/spotting-the-signs</a>                                             |
| 5 | Road to recovery          | <a href="https://www.mhm.org.uk/Blog/road-to-recovery">https://www.mhm.org.uk/Blog/road-to-recovery</a>                                                 |

### 35. Youth Access

Link: <https://www.youthaccess.org.uk/>

Date searched: 4/9/19

Search strategy:

- Website browsed
- Individually searched “self harm”, “self injury”, “parasuicide”, “self injurious behaviour”, “deliberate self harm”, “self cutting” and “self poisoning” in main search bar

Total hits = 20, of which 6 were duplicates

Results which met eligibility criteria for full-text inclusion:

| # | Webpage Name                                                                             | Link                                                                                                                                                                                                            |
|---|------------------------------------------------------------------------------------------|-----------------------------------------------------------------------------------------------------------------------------------------------------------------------------------------------------------------|
| 1 | Children and young people’s views on counselling: improving the tools to gather outcomes | <a href="https://www.youthaccess.org.uk/downloads/childrenandyoungpeoplesviewoncounselling-march20141.pdf">https://www.youthaccess.org.uk/downloads/childrenandyoungpeoplesviewoncounselling-march20141.pdf</a> |

- 2 Guide to induction for newly appointed counsellors in youth information, advice, counselling and support services <https://www.youthaccess.org.uk/downloads/httpwww.youthaccess.org.ukresourcesgoodpracticeloader.pdf>
- 

## 36. Mood Swings

Link: <http://www.moodswings.org.uk/>

Date searched: 5/9/19

Search strategy:

- Website browsed
- Individually searched “self harm”, “self injury”, “parasuicide”, “self injurious behaviour”, “deliberate self harm”, “self cutting” and “self poisoning” in main search bar

Total hits = 0

## 37. No Panic

Link: <https://www.nopanic.org.uk/>

Date searched: 5/9/19

Search strategy:

- Website browsed (2 hits)
- No search bar identified

Total hits = 2

Results which met eligibility criteria for full-text inclusion:

| # | Webpage Name                    | Link                                                                                                                          |
|---|---------------------------------|-------------------------------------------------------------------------------------------------------------------------------|
| 1 | Self-harm and suicidal thoughts | <a href="https://www.nopanic.org.uk/self-harm-suicidal-thoughts/">https://www.nopanic.org.uk/self-harm-suicidal-thoughts/</a> |
| 2 | Recovery and self-help          | <a href="https://www.nopanic.org.uk/recovery-self-help/">https://www.nopanic.org.uk/recovery-self-help/</a>                   |

## 38. Life Centre

Link: <https://lifecentre.uk.com/>

Date searched: 5/9/19

Search strategy:

- Website browsed
- No search bar identified

Total hits = 0

## 39. Survivors UK

Link: <https://www.survivorsuk.org/>

Date searched: 5/9/19

Search strategy:

- Website browsed
- Individually searched “self harm”, “self injury”, “parasuicide”, “self injurious behaviour”, “deliberate self harm”, “self cutting” and “self poisoning” in main search bar

Total hits = 8, of which 0 were duplicates

Results which met eligibility criteria for full-text inclusion:

| # | Webpage Name       | Link                                                                                                                                                                                                                                                                                                                       |
|---|--------------------|----------------------------------------------------------------------------------------------------------------------------------------------------------------------------------------------------------------------------------------------------------------------------------------------------------------------------|
| 1 | Self-help guidance | <a href="https://www.survivorsuk.org/resources/self-help-guidance/">https://www.survivorsuk.org/resources/self-help-guidance/</a><br><a href="http://www.selfhelpguides.ntw.nhs.uk/survivorsmcr/leaflets/selfhelp/Self%20Harm.pdf">http://www.selfhelpguides.ntw.nhs.uk/survivorsmcr/leaflets/selfhelp/Self%20Harm.pdf</a> |

## 40. Self Injury Support Network

Link: <https://www.selfinjurysupport.org.uk/>

Date searched: 5/9/19

Search strategy:

- Website browsed
- Individually searched “self harm”, “self injury”, “parasuicide”, “self injurious behaviour”, “deliberate self harm”, “self cutting” and “self poisoning” in main search bar

Total hits = 989, of which 822 were duplicates

Results which met eligibility criteria for full-text inclusion:

| #  | Webpage Name                                                 | Link                                                                                                                                                                                                                      |
|----|--------------------------------------------------------------|---------------------------------------------------------------------------------------------------------------------------------------------------------------------------------------------------------------------------|
| 1  | What is self-injury?                                         | <a href="https://www.selfinjurysupport.org.uk/what-is-self-injury">https://www.selfinjurysupport.org.uk/what-is-self-injury</a>                                                                                           |
| 2  | Self care and self harm spectrum                             | <a href="https://www.selfinjurysupport.org.uk/self-care-and-self-harm-spectrum">https://www.selfinjurysupport.org.uk/self-care-and-self-harm-spectrum</a>                                                                 |
| 3  | Launch of self-harm prevention app distract                  | <a href="https://www.selfinjurysupport.org.uk/News/launch-of-self-harm-prevention-app-distract">https://www.selfinjurysupport.org.uk/News/launch-of-self-harm-prevention-app-distract</a>                                 |
| 4  | Why do I self-injure?                                        | <a href="https://www.selfinjurysupport.org.uk/why-do-i-self-injure">https://www.selfinjurysupport.org.uk/why-do-i-self-injure</a>                                                                                         |
| 5  | Why does it happen?                                          | <a href="https://www.selfinjurysupport.org.uk/why-does-it-happen">https://www.selfinjurysupport.org.uk/why-does-it-happen</a>                                                                                             |
| 6  | What if I want to stop?                                      | <a href="https://www.selfinjurysupport.org.uk/i-want-to-stop">https://www.selfinjurysupport.org.uk/i-want-to-stop</a>                                                                                                     |
| 7  | Self-harm: a self help guide                                 | <a href="https://www.selfinjurysupport.org.uk/FAQs/a-self-help-guide">https://www.selfinjurysupport.org.uk/FAQs/a-self-help-guide</a>                                                                                     |
| 8  | Self-harm and sexual violence                                | <a href="https://www.selfinjurysupport.org.uk/FAQs/self-harm-and-sexual-violence">https://www.selfinjurysupport.org.uk/FAQs/self-harm-and-sexual-violence</a>                                                             |
| 9  | Self-harm information sheet                                  | <a href="https://www.selfinjurysupport.org.uk/FAQs/self-harm-information-sheet">https://www.selfinjurysupport.org.uk/FAQs/self-harm-information-sheet</a>                                                                 |
| 10 | Reducing self-harm worksheet                                 | <a href="https://www.selfinjurysupport.org.uk/FAQs/reducing-self-harm-worksheet">https://www.selfinjurysupport.org.uk/FAQs/reducing-self-harm-worksheet</a>                                                               |
| 11 | Working through self-harm                                    | <a href="https://www.selfinjurysupport.org.uk/FAQs/working-through-self-harm">https://www.selfinjurysupport.org.uk/FAQs/working-through-self-harm</a>                                                                     |
| 12 | Self-harm in children and young people                       | <a href="https://www.selfinjurysupport.org.uk/FAQs/self-harm-in-children-and-young-people">https://www.selfinjurysupport.org.uk/FAQs/self-harm-in-children-and-young-people</a>                                           |
| 13 | Distraction and distancing from self-harm                    | <a href="https://www.selfinjurysupport.org.uk/FAQs/distraction-and-distancing">https://www.selfinjurysupport.org.uk/FAQs/distraction-and-distancing</a>                                                                   |
| 14 | Self-harm in primary age children                            | <a href="https://www.selfinjurysupport.org.uk/FAQs/self-harm-in-primary-age-children">https://www.selfinjurysupport.org.uk/FAQs/self-harm-in-primary-age-children</a>                                                     |
| 15 | Self-harm: treating people differently and intervening early | <a href="https://www.selfinjurysupport.org.uk/FAQs/self-harm-treating-people-differently-and-intervening-early">https://www.selfinjurysupport.org.uk/FAQs/self-harm-treating-people-differently-and-intervening-early</a> |
| 16 | Coping with self-harm: a guide for parents and carers        | <a href="https://www.selfinjurysupport.org.uk/FAQs/coping-with-self-harm-a-guide-for-parents-and-carers">https://www.selfinjurysupport.org.uk/FAQs/coping-with-self-harm-a-guide-for-parents-and-carers</a>               |
| 17 | Self-harm support action plan accompanying notes             | <a href="https://www.selfinjurysupport.org.uk/FAQs/self-harm-support-action-plan-accompanying-notes">https://www.selfinjurysupport.org.uk/FAQs/self-harm-support-action-plan-accompanying-notes</a>                       |
| 18 | What if I want to stop self-harming?                         | <a href="https://www.selfinjurysupport.org.uk/FAQs/what-if-i-want-to-stop-self-harming">https://www.selfinjurysupport.org.uk/FAQs/what-if-i-want-to-stop-self-harming</a>                                                 |
| 19 | Self-harm report card for seeking treatment                  | <a href="https://www.selfinjurysupport.org.uk/FAQs/self-harm-report-card">https://www.selfinjurysupport.org.uk/FAQs/self-harm-report-card</a>                                                                             |
| 20 | Self harm in children and young people handbook              | <a href="https://www.selfinjurysupport.org.uk/FAQs/self-harm-in-children-and-young-people-handbook">https://www.selfinjurysupport.org.uk/FAQs/self-harm-in-children-and-young-people-handbook</a>                         |

|    |                                                                                                            |                                                                                                                                                                                                                                                                                                                     |
|----|------------------------------------------------------------------------------------------------------------|---------------------------------------------------------------------------------------------------------------------------------------------------------------------------------------------------------------------------------------------------------------------------------------------------------------------|
| 21 | Medical skin camouflage: a recovery intention for female prisoners who self-harm?                          | <a href="https://www.selfinjurysupport.org.uk/FAQs/medical-skin-camouflage-a-recovery-intervention-for-female-prisoners-who-self-harm">https://www.selfinjurysupport.org.uk/FAQs/medical-skin-camouflage-a-recovery-intervention-for-female-prisoners-who-self-harm</a>                                             |
| 22 | Managing self-harm in young people – Royal College of Psychiatrists                                        | <a href="https://www.selfinjurysupport.org.uk/FAQs/managing-self-harm-in-young-people">https://www.selfinjurysupport.org.uk/FAQs/managing-self-harm-in-young-people</a>                                                                                                                                             |
| 23 | Young people who self-harm: a guide for school staff                                                       | <a href="https://www.selfinjurysupport.org.uk/FAQs/young-people-who-self-harm-a-guide-for-school-staff">https://www.selfinjurysupport.org.uk/FAQs/young-people-who-self-harm-a-guide-for-school-staff</a>                                                                                                           |
| 24 | Supporting children and young people who self-harm: guidelines for school staff                            | <a href="https://www.selfinjurysupport.org.uk/FAQs/supporting-children-and-young-people-who-self-harm-guidelines-for-school-staff">https://www.selfinjurysupport.org.uk/FAQs/supporting-children-and-young-people-who-self-harm-guidelines-for-school-staff</a>                                                     |
| 25 | NHS guidelines and resources for schools to help support children and young people who self-harm           | <a href="https://www.selfinjurysupport.org.uk/FAQs/nhs-guidelines-and-resources-for-schools-to-help-support-children-and-young-people-who-self-harm">https://www.selfinjurysupport.org.uk/FAQs/nhs-guidelines-and-resources-for-schools-to-help-support-children-and-young-people-who-self-harm</a>                 |
| 26 | Guidance to providing effective support for self-harm amongst University students: a student's perspective | <a href="https://www.selfinjurysupport.org.uk/FAQs/guidance-to-providing-effective-support-for-self-harm-amongst-university-students-a-students-perspective">https://www.selfinjurysupport.org.uk/FAQs/guidance-to-providing-effective-support-for-self-harm-amongst-university-students-a-students-perspective</a> |
| 27 | Self-harm factsheet for teachers and lecturers                                                             | <a href="https://www.selfinjurysupport.org.uk/FAQs/factsheet-for-teachers-and-lecturers">https://www.selfinjurysupport.org.uk/FAQs/factsheet-for-teachers-and-lecturers</a>                                                                                                                                         |
| 28 | Self-harm minimisation in perspective: teaching and learning guidelines                                    | <a href="https://www.selfinjurysupport.org.uk/FAQs/self-harm-minimisation-in-perspective-teaching-and-learning-guidelines">https://www.selfinjurysupport.org.uk/FAQs/self-harm-minimisation-in-perspective-teaching-and-learning-guidelines</a>                                                                     |
| 29 | Self-harm – what, who, why and how to help                                                                 | <a href="https://www.selfinjurysupport.org.uk/FAQs/self-harm-what-who-why-and-how-to-help">https://www.selfinjurysupport.org.uk/FAQs/self-harm-what-who-why-and-how-to-help</a>                                                                                                                                     |
| 30 | Working with young people who self-harm                                                                    | <a href="https://www.selfinjurysupport.org.uk/FAQs/working-with-people-who-self-harm">https://www.selfinjurysupport.org.uk/FAQs/working-with-people-who-self-harm</a>                                                                                                                                               |
| 31 | Creative self-help ideas and strategies                                                                    | <a href="https://www.selfinjurysupport.org.uk/creative-self-help">https://www.selfinjurysupport.org.uk/creative-self-help</a>                                                                                                                                                                                       |
| 32 | Self injury: what is it?                                                                                   | <a href="https://www.selfinjurysupport.org.uk/FAQs/self-injury-what-is-it">https://www.selfinjurysupport.org.uk/FAQs/self-injury-what-is-it</a>                                                                                                                                                                     |
| 33 | Understanding your self-injury                                                                             | <a href="https://www.selfinjurysupport.org.uk/understanding-self-injury">https://www.selfinjurysupport.org.uk/understanding-self-injury</a>                                                                                                                                                                         |
| 34 | Factsheet on self-injury for parents and guardians                                                         | <a href="https://www.selfinjurysupport.org.uk/FAQs/factsheet-on-self-injury-for-parents-and-guardians">https://www.selfinjurysupport.org.uk/FAQs/factsheet-on-self-injury-for-parents-and-guardians</a>                                                                                                             |
| 35 | Giving a voice to young people on self-injury                                                              | <a href="https://www.selfinjurysupport.org.uk/FAQs/giving-a-voice-to-young-people-on-self-injury">https://www.selfinjurysupport.org.uk/FAQs/giving-a-voice-to-young-people-on-self-injury</a>                                                                                                                       |
| 36 | Self-injury and domestic violence information sheet                                                        | <a href="https://www.selfinjurysupport.org.uk/FAQs/self-injury-and-domestic-violence-information-sheet">https://www.selfinjurysupport.org.uk/FAQs/self-injury-and-domestic-violence-information-sheet</a>                                                                                                           |
| 37 | Self-help for self-injury                                                                                  | <a href="https://www.selfinjurysupport.org.uk/FAQs/self-help-for-self-injury">https://www.selfinjurysupport.org.uk/FAQs/self-help-for-self-injury</a>                                                                                                                                                               |
| 38 | Self-harm support action plan                                                                              | <a href="https://www.selfinjurysupport.org.uk/FAQs/self-harm-support-action-plan-and-accompanying-notes">https://www.selfinjurysupport.org.uk/FAQs/self-harm-support-action-plan-and-accompanying-notes</a>                                                                                                         |
| 39 | Exploring self-injury                                                                                      | <a href="https://www.selfinjurysupport.org.uk/FAQs/exploring-self-injury">https://www.selfinjurysupport.org.uk/FAQs/exploring-self-injury</a>                                                                                                                                                                       |
| 40 | Self-injury and autism                                                                                     | <a href="https://www.selfinjurysupport.org.uk/FAQs/self-injury-and-autism">https://www.selfinjurysupport.org.uk/FAQs/self-injury-and-autism</a>                                                                                                                                                                     |
| 41 | Using mindfulness to distract from self-harm                                                               | <a href="https://www.selfinjurysupport.org.uk/FAQs/mindfulness-booklet">https://www.selfinjurysupport.org.uk/FAQs/mindfulness-booklet</a>                                                                                                                                                                           |
| 42 | Factsheet on self-injury for health professionals                                                          | <a href="https://www.selfinjurysupport.org.uk/FAQs/factsheet-on-self-injury-for-health-professionals">https://www.selfinjurysupport.org.uk/FAQs/factsheet-on-self-injury-for-health-professionals</a>                                                                                                               |
| 43 | Essential guide to self-injury and autism                                                                  | <a href="https://www.selfinjurysupport.org.uk/FAQs/essential-guide-to-self-injurious-behaviour-and-autism">https://www.selfinjurysupport.org.uk/FAQs/essential-guide-to-self-injurious-behaviour-and-autism</a>                                                                                                     |
| 44 | The relationship between self-injury and social media                                                      | <a href="https://www.selfinjurysupport.org.uk/FAQs/the-relationship-between-self-injury-and-social-media">https://www.selfinjurysupport.org.uk/FAQs/the-relationship-between-self-injury-and-social-media</a>                                                                                                       |

---



|    |                                                                                 |                                                                                                                                                                                                                                                                 |
|----|---------------------------------------------------------------------------------|-----------------------------------------------------------------------------------------------------------------------------------------------------------------------------------------------------------------------------------------------------------------|
| 45 | Caring for someone who has self-harmed or had suicidal thoughts: a family guide | <a href="https://www.selfinjurysupport.org.uk/FAQs/caring-for-someone-who-has-self-harmed-or-had-suicidal-thoughts-a-family-guide">https://www.selfinjurysupport.org.uk/FAQs/caring-for-someone-who-has-self-harmed-or-had-suicidal-thoughts-a-family-guide</a> |
| 46 | Predictors of self-injury cessation and subsequent psychological growth         | <a href="https://www.selfinjurysupport.org.uk/FAQs/predictors-of-self-injury-cessation-and-subsequent-psychological-growth">https://www.selfinjurysupport.org.uk/FAQs/predictors-of-self-injury-cessation-and-subsequent-psychological-growth</a>               |
| 47 | Self-help resources for people with learning disabilities                       | <a href="https://www.selfinjurysupport.org.uk/self-help-resources-for-people-with-learning-disabilities">https://www.selfinjurysupport.org.uk/self-help-resources-for-people-with-learning-disabilities</a>                                                     |
| 48 | Distractions and alternatives                                                   | <a href="https://www.selfinjurysupport.org.uk/distractions-and-alternatives">https://www.selfinjurysupport.org.uk/distractions-and-alternatives</a>                                                                                                             |
| 49 | Distractions that can help                                                      | <a href="https://www.selfinjurysupport.org.uk/FAQs/distractions-that-can-help">https://www.selfinjurysupport.org.uk/FAQs/distractions-that-can-help</a>                                                                                                         |
| 50 | Information for parents: what you need to know about self-injury                | <a href="https://www.selfinjurysupport.org.uk/FAQs/information-for-parents">https://www.selfinjurysupport.org.uk/FAQs/information-for-parents</a>                                                                                                               |
| 51 | The 'hurt yourself less' workbook                                               | <a href="https://www.selfinjurysupport.org.uk/FAQs/the-hurt-yourself-less-workbook">https://www.selfinjurysupport.org.uk/FAQs/the-hurt-yourself-less-workbook</a>                                                                                               |
| 52 | Getting help                                                                    | <a href="https://www.selfinjurysupport.org.uk/getting-help">https://www.selfinjurysupport.org.uk/getting-help</a>                                                                                                                                               |
| 53 | Self-care booklet                                                               | <a href="https://www.selfinjurysupport.org.uk/FAQs/self-care-booklet">https://www.selfinjurysupport.org.uk/FAQs/self-care-booklet</a>                                                                                                                           |
| 54 | Distraction techniques and alternative coping strategies                        | <a href="https://www.selfinjurysupport.org.uk/FAQs/distraction-techniques-and-alternative-coping-strategies">https://www.selfinjurysupport.org.uk/FAQs/distraction-techniques-and-alternative-coping-strategies</a>                                             |
| 55 | Managing thoughts and feelings                                                  | <a href="https://www.selfinjurysupport.org.uk/thoughts-and-feelings">https://www.selfinjurysupport.org.uk/thoughts-and-feelings</a>                                                                                                                             |

#### 41. The Mix

Link: <https://www.themix.org.uk/>

Date searched: 13/9/19

Search strategy:

- Website browsed (23 hits)
- Individually searched "self harm", "self injury", "parasuicide", "self injurious behaviour", "deliberate self harm", "self cutting" and "self poisoning" in main search bar

Total hits = 47, of which 9 were duplicates

Results which met eligibility criteria for full-text inclusion:

| # | Webpage Name                                           | Link                                                                                                                                                                                                                                                                    |
|---|--------------------------------------------------------|-------------------------------------------------------------------------------------------------------------------------------------------------------------------------------------------------------------------------------------------------------------------------|
| 1 | Not all self-harm looks like self-harm                 | <a href="https://www.themix.org.uk/mental-health/self-harm/not-all-self-harm-looks-like-self-harm-31094.html">https://www.themix.org.uk/mental-health/self-harm/not-all-self-harm-looks-like-self-harm-31094.html</a>                                                   |
| 2 | We need to talk about online self-harm content         | <a href="https://www.themix.org.uk/mental-health/self-harm/we-need-to-talk-about-online-self-harm-content-30991.html">https://www.themix.org.uk/mental-health/self-harm/we-need-to-talk-about-online-self-harm-content-30991.html</a>                                   |
| 3 | Self harm is an addictive way to cope with mental pain | <a href="https://www.themix.org.uk/mental-health/self-harm/self-harm-is-an-addictive-way-to-cope-with-mental-pain-nonormal-29249.html">https://www.themix.org.uk/mental-health/self-harm/self-harm-is-an-addictive-way-to-cope-with-mental-pain-nonormal-29249.html</a> |
| 4 | Expert chat: more about self-harm                      | <a href="https://www.themix.org.uk/mental-health/self-harm/expert-chat-more-about-self-harm-16446.html">https://www.themix.org.uk/mental-health/self-harm/expert-chat-more-about-self-harm-16446.html</a> (                                                             |
| 5 | Expert chat: self-harm                                 | <a href="https://www.themix.org.uk/mental-health/self-harm/expert-chat-self-harm-13811.html">https://www.themix.org.uk/mental-health/self-harm/expert-chat-self-harm-13811.html</a>                                                                                     |
| 6 | Child abuse made me self-harm                          | <a href="https://www.themix.org.uk/sex-and-relationships/family-life/childhood-abuse-made-me-self-harm-11644.html">https://www.themix.org.uk/sex-and-relationships/family-life/childhood-abuse-made-me-self-harm-11644.html</a>                                         |
| 7 | Expert chat: how I cope with self-harm?                | <a href="https://www.themix.org.uk/mental-health/expert-chat-how-do-i-cope-with-self-harm-9257.html">https://www.themix.org.uk/mental-health/expert-chat-how-do-i-cope-with-self-harm-9257.html</a>                                                                     |
| 8 | Having a self-harm relapse                             | <a href="https://www.themix.org.uk/mental-health/self-harm/having-a-self-harm-relapse-5684.html">https://www.themix.org.uk/mental-health/self-harm/having-a-self-harm-relapse-5684.html</a>                                                                             |
| 9 | Should I take antidepressants?                         | <a href="https://www.themix.org.uk/mental-health/anxiety-ocd-and-phobias/should-i-take-antidepressants-6119.html">https://www.themix.org.uk/mental-health/anxiety-ocd-and-phobias/should-i-take-antidepressants-6119.html</a>                                           |

|    |                                                          |                                                                                                                                                                                                                                                                                       |
|----|----------------------------------------------------------|---------------------------------------------------------------------------------------------------------------------------------------------------------------------------------------------------------------------------------------------------------------------------------------|
| 10 | Coping with their self-harm                              | <a href="https://www.themix.org.uk/mental-health/self-harm/coping-with-self-harm-5692.html">https://www.themix.org.uk/mental-health/self-harm/coping-with-self-harm-5692.html</a>                                                                                                     |
| 11 | I keep on overdosing, what can I do?                     | <a href="https://www.themix.org.uk/mental-health/self-harm/i-keep-on-overdosing-what-can-i-do-6041.html">https://www.themix.org.uk/mental-health/self-harm/i-keep-on-overdosing-what-can-i-do-6041.html</a>                                                                           |
| 12 | How to talk about your mental health                     | <a href="https://www.themix.org.uk/mental-health/looking-after-yourself/how-to-talk-about-your-mental-health-5622.html">https://www.themix.org.uk/mental-health/looking-after-yourself/how-to-talk-about-your-mental-health-5622.html</a>                                             |
| 13 | Dealing with urges to self-harm                          | <a href="https://www.themix.org.uk/mental-health/self-harm/dealing-with-urges-to-self-harm-5698.html">https://www.themix.org.uk/mental-health/self-harm/dealing-with-urges-to-self-harm-5698.html</a>                                                                                 |
| 14 | Steps to self-harm recovery                              | <a href="https://www.themix.org.uk/mental-health/self-harm/steps-to-self-harm-recovery-5697.html">https://www.themix.org.uk/mental-health/self-harm/steps-to-self-harm-recovery-5697.html</a>                                                                                         |
| 15 | Self-harm coping tips and distractions                   | <a href="https://www.themix.org.uk/mental-health/self-harm/self-harm-coping-tips-and-distractions-5696.html">https://www.themix.org.uk/mental-health/self-harm/self-harm-coping-tips-and-distractions-5696.html</a>                                                                   |
| 16 | Self-harm myths                                          | <a href="https://www.themix.org.uk/mental-health/self-harm/self-harm-myths-5695.html">https://www.themix.org.uk/mental-health/self-harm/self-harm-myths-5695.html</a>                                                                                                                 |
| 17 | Self-poisoning and overdosing                            | <a href="https://www.themix.org.uk/mental-health/depression-mental-health/self-poisoning-and-overdosing-5689.html">https://www.themix.org.uk/mental-health/depression-mental-health/self-poisoning-and-overdosing-5689.html</a>                                                       |
| 18 | Their self-harm is too much for me                       | <a href="https://www.themix.org.uk/mental-health/self-harm/their-self-harm-is-too-much-for-me-5693.html">https://www.themix.org.uk/mental-health/self-harm/their-self-harm-is-too-much-for-me-5693.html</a>                                                                           |
| 19 | When your boyfriend/girlfriend self-harms                | <a href="https://www.themix.org.uk/mental-health/self-harm/when-your-boyfriend-girlfriend-self-harms-5691.html">https://www.themix.org.uk/mental-health/self-harm/when-your-boyfriend-girlfriend-self-harms-5691.html</a>                                                             |
| 20 | Telling someone you self-harm                            | <a href="https://www.themix.org.uk/mental-health/self-harm/telling-someone-you-self-harm-5682.html">https://www.themix.org.uk/mental-health/self-harm/telling-someone-you-self-harm-5682.html</a>                                                                                     |
| 21 | Self-harm and your relationships                         | <a href="https://www.themix.org.uk/mental-health/self-harm/self-harm-and-your-relationships-5681.html">https://www.themix.org.uk/mental-health/self-harm/self-harm-and-your-relationships-5681.html</a>                                                                               |
| 22 | What is self-harm?                                       | <a href="https://www.themix.org.uk/mental-health/self-harm/what-is-self-harm-5679.html">https://www.themix.org.uk/mental-health/self-harm/what-is-self-harm-5679.html</a>                                                                                                             |
| 23 | I want to kill myself                                    | <a href="https://www.themix.org.uk/mental-health/depression-mental-health/i-want-to-kill-myself-5651.html">https://www.themix.org.uk/mental-health/depression-mental-health/i-want-to-kill-myself-5651.html</a>                                                                       |
| 24 | Mental health is valid, important and deserves attention | <a href="https://www.themix.org.uk/mental-health/body-image-and-self-esteem/sometimes-its-hard-to-feel-human-but-you-deserve-help-29099.html">https://www.themix.org.uk/mental-health/body-image-and-self-esteem/sometimes-its-hard-to-feel-human-but-you-deserve-help-29099.html</a> |
| 25 | Young men are hidden self-harmers                        | <a href="https://www.themix.org.uk/news-and-research/news/young-men-are-hidden-self-harmers">https://www.themix.org.uk/news-and-research/news/young-men-are-hidden-self-harmers</a>                                                                                                   |
| 26 | Family therapy                                           | <a href="https://www.themix.org.uk/sex-and-relationships/family-life/family-therapy-7961.html">https://www.themix.org.uk/sex-and-relationships/family-life/family-therapy-7961.html</a>                                                                                               |
| 27 | Self-harm blog week: breaking the silence                | <a href="https://www.themix.org.uk/news-and-research/blogs/self-harm-blog-week-breaking-the-silence">https://www.themix.org.uk/news-and-research/blogs/self-harm-blog-week-breaking-the-silence</a>                                                                                   |
| 28 | Local help, easily found                                 | <a href="https://www.themix.org.uk/news-and-research/news/local-help-easily-found">https://www.themix.org.uk/news-and-research/news/local-help-easily-found</a>                                                                                                                       |

## 42. Young Minds

Link: <https://youngminds.org.uk/>

Date searched: 17/9/19

Search strategy:

- Website browsed (1 hit)
- Individually searched “self harm”, “self injury”, “parasuicide”, “self cutting” and “self poisoning” in main search bar

Total hits = 529, of which 319 were duplicates

Results which met eligibility criteria for full-text inclusion:

| # | Webpage Name            | Link                                                                                                                                                    |
|---|-------------------------|---------------------------------------------------------------------------------------------------------------------------------------------------------|
| 1 | Self-harm               | <a href="https://youngminds.org.uk/find-help/feelings-and-symptoms/self-harm/">https://youngminds.org.uk/find-help/feelings-and-symptoms/self-harm/</a> |
| 2 | Young men and self-harm | <a href="https://youngminds.org.uk/blog/young-men-and-self-harm/">https://youngminds.org.uk/blog/young-men-and-self-harm/</a>                           |

|    |                                                                |                                                                                                                                                                                                                                                 |
|----|----------------------------------------------------------------|-------------------------------------------------------------------------------------------------------------------------------------------------------------------------------------------------------------------------------------------------|
| 3  | My Story of Self-Harm Recovery                                 | <a href="https://youngminds.org.uk/blog/my-story-of-self-harm-recovery/">https://youngminds.org.uk/blog/my-story-of-self-harm-recovery/</a>                                                                                                     |
| 4  | Responding to self-harm video                                  | <a href="https://youngminds.org.uk/resources/school-resources/responding-to-self-harm-video/">https://youngminds.org.uk/resources/school-resources/responding-to-self-harm-video/</a>                                                           |
| 5  | Self-harm: having the first conversation                       | <a href="https://youngminds.org.uk/resources/school-resources/self-harm-having-the-first-conversation/">https://youngminds.org.uk/resources/school-resources/self-harm-having-the-first-conversation/</a>                                       |
| 6  | No harm done: talking to young people about self-harm          | <a href="https://youngminds.org.uk/blog/no-harm-done-talking-to-young-people-about-self-harm/">https://youngminds.org.uk/blog/no-harm-done-talking-to-young-people-about-self-harm/</a>                                                         |
| 7  | Self harm                                                      | <a href="https://youngminds.org.uk/ucommerce/self-harm/c-23/p-177/">https://youngminds.org.uk/ucommerce/self-harm/c-23/p-177/</a>                                                                                                               |
| 8  | Self harm: what young people say                               | <a href="https://youngminds.org.uk/resources/school-resources/self-harm-what-young-people-say/">https://youngminds.org.uk/resources/school-resources/self-harm-what-young-people-say/</a>                                                       |
| 9  | Responding to self-harm guide                                  | <a href="https://youngminds.org.uk/resources/school-resources/responding-to-self-harm-guide/">https://youngminds.org.uk/resources/school-resources/responding-to-self-harm-guide/</a>                                                           |
| 10 | Supporting your child who is self-harming                      | <a href="https://youngminds.org.uk/find-help/for-parents/parents-guide-to-support-a-z/parents-guide-to-support-self-harm/">https://youngminds.org.uk/find-help/for-parents/parents-guide-to-support-a-z/parents-guide-to-support-self-harm/</a> |
| 11 | 5 things you can do if someone tells you they are self-harming | <a href="https://youngminds.org.uk/blog/five-things-you-can-do-if-someone-tells-you-they-are-self-harming/">https://youngminds.org.uk/blog/five-things-you-can-do-if-someone-tells-you-they-are-self-harming/</a>                               |

## 43. MindEd

Link: <https://www.minded.org.uk/>

Date searched: 21/8/19

Search strategy:

- Website browsed
- Individually searched “self harm”, “self injury”, “parasuicide”, “self injurious behaviour”, “deliberate self harm”, “self cutting” and “self poisoning” in main search bar

Total hits = 1

No results met eligibility criteria for full-text screening

## 44. Child Protection Company

Link: <https://www.childprotectioncompany.com/CPC/index.html>

Date searched: 4/9/19

Search strategy:

- Website browsed
- Individually searched “self harm”, “self injury”, “parasuicide”, “self injurious behaviour”, “deliberate self harm”, “self cutting” and “self poisoning” in main search bar

Total hits = 6, of which 0 were duplicates

Results which met eligibility criteria for full-text inclusion:

| # | Webpage Name                            | Link                                                                                                                                                                                                            |
|---|-----------------------------------------|-----------------------------------------------------------------------------------------------------------------------------------------------------------------------------------------------------------------|
| 1 | Understanding self-harm in young people | <a href="https://www.childprotectioncompany.com/CPC/news/general/understanding-self-harm-in-young-people/">https://www.childprotectioncompany.com/CPC/news/general/understanding-self-harm-in-young-people/</a> |

## 45. The Silver Line

Link: <https://www.thesilverline.org.uk/>

Date searched: 4/9/19

Search strategy:

- Website browsed
- No search bar identified

Total hits = 0

#### 46. Adullam Ministries

Link: <http://www.adullam-ministries.org.uk/site/>

Date searched: 3/9/19

Search strategy:

- Website browsed (7)
- Individually searched “self harm”, “self injury”, “parasuicide”, “self injurious behaviour”, “deliberate self harm”, “self cutting” and “self poisoning” in main search bar

Total hits = 13, of which 3 were duplicates

Results which met eligibility criteria for full-text inclusion:

| # | Webpage Name             | Link                                                                                                                                                                    |
|---|--------------------------|-------------------------------------------------------------------------------------------------------------------------------------------------------------------------|
| 1 | What is self harm?       | <a href="http://www.adullam-ministries.org.uk/site/self-harm/what-is-self-harm/">http://www.adullam-ministries.org.uk/site/self-harm/what-is-self-harm/</a>             |
| 2 | Who self harms?          | <a href="http://www.adullam-ministries.org.uk/site/self-harm/self-harms/">http://www.adullam-ministries.org.uk/site/self-harm/self-harms/</a>                           |
| 3 | Why do people self harm? | <a href="http://www.adullam-ministries.org.uk/site/self-harm/why-do-people-self-harm/">http://www.adullam-ministries.org.uk/site/self-harm/why-do-people-self-harm/</a> |
| 4 | Related struggles        | <a href="http://www.adullam-ministries.org.uk/site/self-harm/related-struggles/">http://www.adullam-ministries.org.uk/site/self-harm/related-struggles/</a>             |
| 5 | Getting help             | <a href="http://www.adullam-ministries.org.uk/site/self-harmers/getting-help/">http://www.adullam-ministries.org.uk/site/self-harmers/getting-help/</a>                 |
| 6 | Alternatives             | <a href="http://www.adullam-ministries.org.uk/site/self-harmers/alternatives/">http://www.adullam-ministries.org.uk/site/self-harmers/alternatives/</a>                 |
| 7 | Survivors’ stories       | <a href="http://www.adullam-ministries.org.uk/site/self-harmers/survivors-stories/">http://www.adullam-ministries.org.uk/site/self-harmers/survivors-stories/</a>       |
| 8 | How to respond           | <a href="http://www.adullam-ministries.org.uk/site/carers/how-to-respond/">http://www.adullam-ministries.org.uk/site/carers/how-to-respond/</a>                         |

#### 47. Scottish Association for Mental Health

Link: <https://www.samh.org.uk/>

Date searched: 21/8/19

Search strategy:

- Website browsed (2 hits)
- No search bar identified

Total hits = 2

Results which met eligibility criteria for full-text inclusion:

| # | Webpage Name            | Link                                                                                                                                                                    |
|---|-------------------------|-------------------------------------------------------------------------------------------------------------------------------------------------------------------------|
| 1 | Self harm information   | <a href="https://www.samh.org.uk/about-mental-health/mental-health-problems/self-harm">https://www.samh.org.uk/about-mental-health/mental-health-problems/self-harm</a> |
| 2 | Understanding self harm | <a href="https://www.samh.org.uk/documents/SAMH_Understanding_Self_Harm.pdf">https://www.samh.org.uk/documents/SAMH_Understanding_Self_Harm.pdf</a>                     |

#### 48. Action Mental Health Northern Ireland

Link: <https://www.amh.org.uk/>

Date searched: 21/8/19

Search strategy:

- Website browsed
- Individually searched “self harm”, “self injury”, “parasuicide”, “self injurious behaviour”, “deliberate self harm”, “self cutting” and “self poisoning” in main search bar

Total hits 5, of which 0 were duplicates

No results met eligibility criteria for full-text screening

## 49. The King's Fund

Link: <https://www.kingsfund.org.uk/>

Date searched: 20/9/19

Search strategy:

- Website browsed
- Individually searched "self harm", "self injury", "parasuicide", "self injurious behaviour", "deliberate self harm", "self cutting" and "self poisoning" in main search bar

Total hits = 19, of which 1 was a duplicate

Results which met eligibility criteria for full-text inclusion:

| # | Webpage Name                                                                         | Link                                                                                                                                                                                                                                          |
|---|--------------------------------------------------------------------------------------|-----------------------------------------------------------------------------------------------------------------------------------------------------------------------------------------------------------------------------------------------|
| 1 | 2019 GKS IMPACT Awards:<br>Off the Record Youth<br>Counselling Croydon               | <a href="https://www.kingsfund.org.uk/audio-video/2019-gsk-impact-awards-off-the-record">https://www.kingsfund.org.uk/audio-video/2019-gsk-impact-awards-off-the-record</a>                                                                   |
| 2 | Improving mental health:<br>recognising the vital role of<br>charities               | <a href="https://www.kingsfund.org.uk/blog/2015/05/improving-mental-health-recognising-vital-role-charities">https://www.kingsfund.org.uk/blog/2015/05/improving-mental-health-recognising-vital-role-charities</a>                           |
| 3 | Claire Murdoch – mental<br>health: from rhetoric to<br>reality?                      | <a href="https://www.kingsfund.org.uk/audio-video/claire-murdoch-mental-health-rhetoric-reality">https://www.kingsfund.org.uk/audio-video/claire-murdoch-mental-health-rhetoric-reality</a>                                                   |
| 4 | Christopher Hilton:<br>Integrating physical health,<br>mental health and social care | <a href="https://www.kingsfund.org.uk/audio-video/christopher-hilton-integrating-physical-mental-social-care">https://www.kingsfund.org.uk/audio-video/christopher-hilton-integrating-physical-mental-social-care</a>                         |
| 5 | 10 priorities for integrating<br>physical and mental health                          | <a href="https://www.kingsfund.org.uk/publications/physical-and-mental-health/priorities-for-integrating">https://www.kingsfund.org.uk/publications/physical-and-mental-health/priorities-for-integrating</a>                                 |
| 6 | Charities win prestigious<br>awards for improving health<br>in the UK                | <a href="https://www.kingsfund.org.uk/press/press-releases/charities-win-prestigious-awards-improving-health-uk">https://www.kingsfund.org.uk/press/press-releases/charities-win-prestigious-awards-improving-health-uk</a>                   |
| 7 | Young people's health<br>charity steps forward to<br>claim top accolade              | <a href="https://www.kingsfund.org.uk/press/press-releases/young-peoples-health-charity-steps-forward-claim-top-accolade">https://www.kingsfund.org.uk/press/press-releases/young-peoples-health-charity-steps-forward-claim-top-accolade</a> |
| 8 | Health charities win<br>prestigious awards for life-<br>changing words               | <a href="https://www.kingsfund.org.uk/press/press-releases/health-charities-win-prestigious-awards-life-changing-work">https://www.kingsfund.org.uk/press/press-releases/health-charities-win-prestigious-awards-life-changing-work</a>       |

**Supplementary C.** Results of the advanced Google search.

| # | Title                                                       | Link                                                                                                                                                                                                                  | Met Criteria? | Reason for Exclusion |
|---|-------------------------------------------------------------|-----------------------------------------------------------------------------------------------------------------------------------------------------------------------------------------------------------------------|---------------|----------------------|
| 1 | Self-harm - NHS                                             | <a href="https://www.nhs.uk/conditions/self-harm/">https://www.nhs.uk/conditions/self-harm/</a>                                                                                                                       | No            | Duplicate            |
| 2 | Self-harm – Royal<br>College of Psychiatrists               | <a href="https://www.rcpsych.ac.uk/mental-health/problems-disorders/self-harm">https://www.rcpsych.ac.uk/mental-health/problems-disorders/self-harm</a>                                                               | No            | Duplicate            |
| 3 | Self-harm - Wikipedia                                       | <a href="https://en.wikipedia.org/wiki/Self-harm">https://en.wikipedia.org/wiki/Self-harm</a>                                                                                                                         | Yes           |                      |
| 4 | Self-harm – Mind, the<br>mental health charity              | <a href="https://www.mind.org.uk/information-support/types-of-mental-health-problems/self-harm/#.XYyEB1VKiUk">https://www.mind.org.uk/information-support/types-of-mental-health-problems/self-harm/#.XYyEB1VKiUk</a> | No            | Duplicate            |
| 5 | Self-harm -<br>YoungMinds                                   | <a href="https://youngminds.org.uk/find-help/feelings-and-symptoms/self-harm/">https://youngminds.org.uk/find-help/feelings-and-symptoms/self-harm/</a>                                                               | No            | Duplicate            |
| 6 | The truth about self-<br>harm – Mental Health<br>Foundation | <a href="https://www.mentalhealth.org.uk/publications/truth-about-self-harm">https://www.mentalhealth.org.uk/publications/truth-about-self-harm</a>                                                                   | Yes           |                      |
| 7 | Self-harm – Mental<br>Health Foundation                     | <a href="https://www.mentalhealth.org.uk/a-to-z/self-harm">https://www.mentalhealth.org.uk/a-to-z/self-harm</a>                                                                                                       | Yes           |                      |

|    |                                                                  |                                                                                                                                                                                                                                 |     |                 |
|----|------------------------------------------------------------------|---------------------------------------------------------------------------------------------------------------------------------------------------------------------------------------------------------------------------------|-----|-----------------|
| 8  | Self-injurious behaviour – National Autistic Society             | <a href="https://www.autism.org.uk/about/behaviour/challenging-behaviour/self-injury.aspx">https://www.autism.org.uk/about/behaviour/challenging-behaviour/self-injury.aspx</a>                                                 | Yes |                 |
| 9  | Home – SelfHarmUK                                                | <a href="https://www.selfharm.co.uk/">https://www.selfharm.co.uk/</a>                                                                                                                                                           | No  | Duplicate       |
| 10 | Overview – Self-harm – Quality standards - NICE                  | <a href="https://www.nice.org.uk/guidance/qs34">https://www.nice.org.uk/guidance/qs34</a>                                                                                                                                       | No  | Duplicate       |
| 11 | Self-harm - Childline                                            | <a href="https://www.childline.org.uk/info-advice/your-feelings/self-harm/">https://www.childline.org.uk/info-advice/your-feelings/self-harm/</a>                                                                               | No  | Duplicate       |
| 12 | Self-harm overview – NICE pathways                               | <a href="https://pathways.nice.org.uk/pathways/self-harm">https://pathways.nice.org.uk/pathways/self-harm</a>                                                                                                                   | No  | Duplicate       |
| 13 | Self-harm – NHS inform                                           | <a href="https://www.nhsinform.scot/illnesses-and-conditions/mental-health/self-harm">https://www.nhsinform.scot/illnesses-and-conditions/mental-health/self-harm</a>                                                           | Yes |                 |
| 14 | What is self-harm – MQ: Transforming Mental Health               | <a href="https://www.mqmentalhealth.org/articles/self-harm">https://www.mqmentalhealth.org/articles/self-harm</a>                                                                                                               | Yes |                 |
| 15 | Cutting and self-harm – HelpGuide.org                            | <a href="https://www.helpguide.org/articles/anxiety/cutting-and-self-harm.htm">https://www.helpguide.org/articles/anxiety/cutting-and-self-harm.htm</a>                                                                         | No  | Outside UK      |
| 16 | Cutting & self-harm: Warning Signs and Treatment                 | <a href="https://www.webmd.com/mental-health/features/cutting-self-harm-signs-treatment#1">https://www.webmd.com/mental-health/features/cutting-self-harm-signs-treatment#1</a>                                                 | No  | Outside UK      |
| 17 | Self-harm – Rethink Mental Illness, the mental health charity    | <a href="https://www.rethink.org/advice-and-information/about-mental-illness/learn-more-about-symptoms/self-harm/">https://www.rethink.org/advice-and-information/about-mental-illness/learn-more-about-symptoms/self-harm/</a> | No  | Duplicate       |
| 18 | Self-injury/cutting – Symptoms and causes – Mayo Clinic          | <a href="https://www.mayoclinic.org/diseases-conditions/self-injury/symptoms-causes/syc-20350950">https://www.mayoclinic.org/diseases-conditions/self-injury/symptoms-causes/syc-20350950</a>                                   | No  | Outside UK      |
| 19 | The NSHN Forum                                                   | <a href="http://www.nshn.co.uk/">http://www.nshn.co.uk/</a>                                                                                                                                                                     | No  | Forum           |
| 20 | Self-harm: MedlinePlus                                           | <a href="https://medlineplus.gov/selfharm.html">https://medlineplus.gov/selfharm.html</a>                                                                                                                                       | No  | Outside UK      |
| 21 | Deliberate self-harm in adolescents - NCBI                       | <a href="https://www.ncbi.nlm.nih.gov/pmc/articles/PMC4469847/">https://www.ncbi.nlm.nih.gov/pmc/articles/PMC4469847/</a>                                                                                                       | No  | Empirical study |
| 22 | The epidemiology of self-poisoning in the UK – NCBI              | <a href="https://www.ncbi.nlm.nih.gov/pmc/articles/PMC1884308/">https://www.ncbi.nlm.nih.gov/pmc/articles/PMC1884308/</a>                                                                                                       | No  | Empirical study |
| 23 | NHS figures show ‘shocking’ rise in self-harm among young people | <a href="https://www.theguardian.com/society/2016/oct/23/nhs-figures-show-shocking-rise-self-harm-young-people">https://www.theguardian.com/society/2016/oct/23/nhs-figures-show-shocking-rise-self-harm-young-people</a>       | Yes |                 |
| 24 | Self-harm – Psychology Today UK                                  | <a href="https://www.psychologytoday.com/gb/basics/self-harm">https://www.psychologytoday.com/gb/basics/self-harm</a>                                                                                                           | Yes |                 |
| 25 | Self-harm - NSPCC                                                | <a href="https://www.nspcc.org.uk/preventing-abuse/keeping-children-safe/self-harm/">https://www.nspcc.org.uk/preventing-abuse/keeping-children-safe/self-harm/</a>                                                             | Yes |                 |
| 26 | Self-harm - LifeLine                                             | <a href="https://www.lifeline.org.au/get-help/topics/self-harm">https://www.lifeline.org.au/get-help/topics/self-harm</a>                                                                                                       | No  | Outside UK      |
| 27 | Self-harm – NAMI: National Alliance on Mental Illness            | <a href="https://www.nami.org/learn-more/mental-health-conditions/related-conditions/self-harm">https://www.nami.org/learn-more/mental-health-conditions/related-conditions/self-harm</a>                                       | No  | Outside UK      |
| 28 | Self Injury Support Ltd                                          | <a href="https://www.selfinjurysupport.org.uk/">https://www.selfinjurysupport.org.uk/</a>                                                                                                                                       | No  | Duplicate       |
| 29 | Self-harm – Time to Change                                       | <a href="https://www.time-to-change.org.uk/category/blog/self-harm">https://www.time-to-change.org.uk/category/blog/self-harm</a>                                                                                               | Yes |                 |
| 30 | Self-Injurious Behaviour: Summary. About Behaviour.              | <a href="https://www.challengingbehaviour.org.uk/understanding-behaviour/self-injurious-behaviour-sheet.html">https://www.challengingbehaviour.org.uk/understanding-behaviour/self-injurious-behaviour-sheet.html</a>           | Yes |                 |
| 31 | What self-injury is - LifeSIGNS                                  | <a href="http://www.lifesigns.org.uk/what/">http://www.lifesigns.org.uk/what/</a>                                                                                                                                               | Yes |                 |
| 32 | Suicide and parasuicide – a comparison                           | <a href="https://www.gpnotebook.co.uk/simplepage.cfm?ID=-328531967">https://www.gpnotebook.co.uk/simplepage.cfm?ID=-328531967</a>                                                                                               | Yes |                 |

|    |                                                                                           |                                                                                                                                                                                                                                                                                       |     |                     |
|----|-------------------------------------------------------------------------------------------|---------------------------------------------------------------------------------------------------------------------------------------------------------------------------------------------------------------------------------------------------------------------------------------|-----|---------------------|
| 33 | Trends in self-poisoning and psychotropic drug use in people aged 5-19 years              | <a href="https://bmjopen.bmj.com/content/9/2/e026001">https://bmjopen.bmj.com/content/9/2/e026001</a>                                                                                                                                                                                 | No  | Empirical study     |
| 34 | BBC Radio 1 – BBC Advice – Self-harm                                                      | <a href="https://www.bbc.co.uk/programmes/articles/1LJd4YvhLTnLRH7WgF8pypI/self-harm">https://www.bbc.co.uk/programmes/articles/1LJd4YvhLTnLRH7WgF8pypI/self-harm</a>                                                                                                                 | No  | Content unavailable |
| 35 | Self-harm and Suicide Prevention Competency Framework                                     | <a href="https://www.ucl.ac.uk/pals/research/clinical-educational-and-health-psychology/research-groups/core/competence-frameworks/self-harm">https://www.ucl.ac.uk/pals/research/clinical-educational-and-health-psychology/research-groups/core/competence-frameworks/self-harm</a> | No  | Duplicate           |
| 36 | What is self-harm? Parents' guide – Internet Matters                                      | <a href="https://www.internetmatters.org/issues/self-harm/">https://www.internetmatters.org/issues/self-harm/</a>                                                                                                                                                                     | Yes |                     |
| 37 | SCIE Research briefing 16: Deliberate self-harm                                           | <a href="https://www.scie.org.uk/publications/briefings/briefing16/">https://www.scie.org.uk/publications/briefings/briefing16/</a>                                                                                                                                                   | Yes |                     |
| 38 | Self-injury (Cutting, Self-Harm or Self-Mutilation)                                       | <a href="https://www.mhanational.org/conditions/self-injury-cutting-self-harm-or-self-mutilation">https://www.mhanational.org/conditions/self-injury-cutting-self-harm-or-self-mutilation</a>                                                                                         | No  | Outside UK          |
| 39 | Self-harm – The Scout Association                                                         | <a href="https://members.scouts.org.uk/supportresources/2444/selfharm?cat=299,303&amp;moduleID=10">https://members.scouts.org.uk/supportresources/2444/selfharm?cat=299,303&amp;moduleID=10</a>                                                                                       | Yes |                     |
| 40 | Self-harm – Definition of Self-Harm by Merriam-Webster                                    | <a href="https://www.merriam-webster.com/dictionary/self-harm">https://www.merriam-webster.com/dictionary/self-harm</a>                                                                                                                                                               | No  | Outside UK          |
| 41 | The Cornell Research Programme on Self-Injury and Recovery                                | <a href="http://www.selfinjury.bctr.cornell.edu/">http://www.selfinjury.bctr.cornell.edu/</a>                                                                                                                                                                                         | No  | Outside UK          |
| 42 | Self-harm – latest news, breaking stories and comment – The Independent                   | <a href="https://www.independent.co.uk/topic/self-harm">https://www.independent.co.uk/topic/self-harm</a>                                                                                                                                                                             | Yes |                     |
| 43 | Deliberate self-harm in the UK armed forces: index – GOV.UK                               | <a href="https://www.gov.uk/government/collections/deliberate-self-harm-in-the-uk-armed-forces-index">https://www.gov.uk/government/collections/deliberate-self-harm-in-the-uk-armed-forces-index</a>                                                                                 | Yes |                     |
| 44 | Adolescent self-harm – Association for Young People's Health                              | <a href="http://www.youngpeopleshealth.org.uk/wp-content/uploads/2015/07/316_RU13-Self-harm-summary.pdf">http://www.youngpeopleshealth.org.uk/wp-content/uploads/2015/07/316_RU13-Self-harm-summary.pdf</a>                                                                           | Yes |                     |
| 45 | Self-harm Service – SLaM National Services                                                | <a href="https://www.national.slam.nhs.uk/services/adult-services/selfharm/">https://www.national.slam.nhs.uk/services/adult-services/selfharm/</a>                                                                                                                                   | Yes |                     |
| 46 | Guidance for people working with young people at risk from self-harm or suicide published | <a href="https://www.glasgow.gov.uk/article/19042/Guidance-for-people-working-with-young-people-at-risk-from-self-harm-or-suicide-published">https://www.glasgow.gov.uk/article/19042/Guidance-for-people-working-with-young-people-at-risk-from-self-harm-or-suicide-published</a>   | Yes |                     |
| 47 | Encyclopaedia: self-harm – NHS Direct Wales                                               | <a href="https://www.nhsdirect.wales.nhs.uk/Encyclopaedia/s/article/selfharm/">https://www.nhsdirect.wales.nhs.uk/Encyclopaedia/s/article/selfharm/</a>                                                                                                                               | Yes |                     |
| 48 | Counselling for Self-Harm – Counselling Directory                                         | <a href="https://www.counselling-directory.org.uk/self-harm.html">https://www.counselling-directory.org.uk/self-harm.html</a>                                                                                                                                                         | Yes |                     |
| 49 | Self-harm in girls and young women rising at 'alarming' rate                              | <a href="https://news.sky.com/story/self-harm-in-girls-and-young-women-rising-at-alarming-rate-11735074">https://news.sky.com/story/self-harm-in-girls-and-young-women-rising-at-alarming-rate-11735074</a>                                                                           | Yes |                     |

|    |                                                                                                                                        |                                                                                                                                                                                                                                                                                                                                         |     |                        |
|----|----------------------------------------------------------------------------------------------------------------------------------------|-----------------------------------------------------------------------------------------------------------------------------------------------------------------------------------------------------------------------------------------------------------------------------------------------------------------------------------------|-----|------------------------|
| 50 | Self-Harm Project<br>Aberdeen – Penumbra                                                                                               | <a href="http://www.penumbra.org.uk/service-locations/north-area-services/aberdeen/self-harm/">http://www.penumbra.org.uk/service-locations/north-area-services/aberdeen/self-harm/</a>                                                                                                                                                 | Yes |                        |
| 51 | Self-Harm – University<br>of Plymouth                                                                                                  | <a href="https://www.plymouth.ac.uk/student-life/services/student-services/shine/self-harm">https://www.plymouth.ac.uk/student-life/services/student-services/shine/self-harm</a>                                                                                                                                                       | Yes |                        |
| 52 | Self-harm – St Bede’s<br>School                                                                                                        | <a href="https://www.st-bedes.surrey.sch.uk/1167/self-harm">https://www.st-bedes.surrey.sch.uk/1167/self-harm</a>                                                                                                                                                                                                                       | Yes |                        |
| 53 | Self-Injury – Autism<br>Research Institute                                                                                             | <a href="https://www.autism.org/self-injury/">https://www.autism.org/self-injury/</a>                                                                                                                                                                                                                                                   | No  | Outside UK             |
| 54 | Suicide and Self-Harm:<br>Cumbria County<br>School                                                                                     | <a href="http://www.cumbrialscb.com/LSCB/professionals/ssh.asp">http://www.cumbrialscb.com/LSCB/professionals/ssh.asp</a>                                                                                                                                                                                                               | Yes |                        |
| 55 | Self-harm in children<br>and young people –<br>information and advice<br>for parents and carers                                        | <a href="https://infolink.suffolk.gov.uk/kb5/suffolk/infolink/advice.page?id=0pYooMSGlxM">https://infolink.suffolk.gov.uk/kb5/suffolk/infolink/advice.page?id=0pYooMSGlxM</a>                                                                                                                                                           | Yes |                        |
| 56 | Factsheet: Self-Injurious<br>Behaviour                                                                                                 | <a href="file:///C:/Users/meddrom/Downloads/Self%20Injurious%20Behaviour%2008%20(1).pdf">file:///C:/Users/meddrom/Downloads/Self%20Injurious%20Behaviour%2008%20(1).pdf</a>                                                                                                                                                             | No  | Content<br>unavailable |
| 57 | If you want to self-<br>harm - Samaritans                                                                                              | <a href="https://www.samaritans.org/how-we-can-help/support-and-information/if-youre-having-difficult-time/if-you-want-self-harm/">https://www.samaritans.org/how-we-can-help/support-and-information/if-youre-having-difficult-time/if-you-want-self-harm/</a>                                                                         | No  | Duplicate              |
| 58 | Self-harm in England<br>and Wales: an<br>epidemiological study<br>of prevalence, risk<br>factors, clustering and<br>subsequent suicide | <a href="https://www.thelancet.com/journals/lancet/article/PIIS0140-6736(13)62118-2/fulltext">https://www.thelancet.com/journals/lancet/article/PIIS0140-6736(13)62118-2/fulltext</a>                                                                                                                                                   | No  | Empirical study        |
| 59 | Self-harm – Student<br>home, University of<br>York                                                                                     | <a href="https://www.york.ac.uk/students/health/advice/self-harm/">https://www.york.ac.uk/students/health/advice/self-harm/</a>                                                                                                                                                                                                         | Yes |                        |
| 60 | Self-harm – Nightingale<br>Hospital London                                                                                             | <a href="https://www.nightingalehospital.co.uk/self-harm/">https://www.nightingalehospital.co.uk/self-harm/</a>                                                                                                                                                                                                                         | Yes |                        |
| 61 | Support Organisations<br>– Self-Harm – Channel<br>4                                                                                    | <a href="https://www.channel4.com/4viewers/help/self-harm">https://www.channel4.com/4viewers/help/self-harm</a>                                                                                                                                                                                                                         | Yes |                        |
| 62 | Automutilation – an<br>overview –<br>ScienceDirect Topics                                                                              | <a href="https://www.sciencedirect.com/topics/neuroscience/automutilation">https://www.sciencedirect.com/topics/neuroscience/automutilation</a>                                                                                                                                                                                         | No  | Empirical study        |
| 63 | NSHN – What is Self-<br>harm?                                                                                                          | <a href="http://www.nshn.co.uk/whatis.html">http://www.nshn.co.uk/whatis.html</a>                                                                                                                                                                                                                                                       | Yes |                        |
| 64 | Self-Harm – CAMHS                                                                                                                      | <a href="http://www.blackcountryminds.com/help-advice/self-harm/">http://www.blackcountryminds.com/help-advice/self-harm/</a>                                                                                                                                                                                                           | Yes |                        |
| 65 | Intentional self-harm in<br>adolescence                                                                                                | <a href="https://assets.publishing.service.gov.uk/government/uploads/system/uploads/attachment_data/file/621068/Health_behaviour_in_school_age_children_self-harm.pdf">https://assets.publishing.service.gov.uk/government/uploads/system/uploads/attachment_data/file/621068/Health_behaviour_in_school_age_children_self-harm.pdf</a> | Yes |                        |
| 66 | Self-harm in older<br>adults: a forgotten<br>group?                                                                                    | <a href="https://www.nationalelfservice.net/mental-health/self-harm/self-harm-in-older-adults/">https://www.nationalelfservice.net/mental-health/self-harm/self-harm-in-older-adults/</a>                                                                                                                                               | Yes |                        |
| 67 | Self-Injury Information,<br>Resources & Support -<br>HealthyPlace                                                                      | <a href="https://www.healthypalace.com/abuse/self-injury/self-injury-homepage">https://www.healthypalace.com/abuse/self-injury/self-injury-homepage</a>                                                                                                                                                                                 | No  | Outside UK             |



|    |                                                                                                                                  |                                                                                                                                                                                                                                                 |     |                        |
|----|----------------------------------------------------------------------------------------------------------------------------------|-------------------------------------------------------------------------------------------------------------------------------------------------------------------------------------------------------------------------------------------------|-----|------------------------|
| 68 | What is self-harm? –<br>Self-harm – ReachOut<br>Australia                                                                        | <a href="https://au.reachout.com/articles/what-is-self-harm">https://au.reachout.com/articles/what-is-self-harm</a>                                                                                                                             | No  | Outside UK             |
| 69 | Glorifying self-harm in<br>adolescence – Twitter<br>help centre                                                                  | <a href="https://help.twitter.com/en/rules-and-policies/glorifying-self-harm">https://help.twitter.com/en/rules-and-policies/glorifying-self-harm</a>                                                                                           | No  | Social media           |
| 70 | BACP CPD hub – Self-<br>harm                                                                                                     | <a href="https://www.bacp.co.uk/cpd/cpd-hub/self-harm/">https://www.bacp.co.uk/cpd/cpd-hub/self-harm/</a>                                                                                                                                       | No  | Content<br>unavailable |
| 71 | Self-harm – Stem4<br>Talk to me 2: suicide<br>and self-harm<br>prevention strategy<br>for...                                     | <a href="https://stem4.org.uk/self-harm/">https://stem4.org.uk/self-harm/</a>                                                                                                                                                                   | Yes |                        |
| 72 | Condition – Self harm –<br>Sussex Partnership<br>NHS Foundation Trust                                                            | <a href="https://www.sussexpartnership.nhs.uk/condition-self-harm">https://www.sussexpartnership.nhs.uk/condition-self-harm</a>                                                                                                                 | Yes |                        |
| 74 | Self-harm and Risky<br>Behaviour – MindEd<br>hub                                                                                 | <a href="https://www.minded.org.uk/Component/Details/445676">https://www.minded.org.uk/Component/Details/445676</a>                                                                                                                             | No  | Content<br>unavailable |
| 75 | Child and Adolescent<br>Self-Harm in Europe –<br>A study<br>Dudley and Walsall –<br>Mental Health<br>partnerhip >> Self-<br>Harm | <a href="http://ec.europa.eu/justice/grants/results/daphne-toolkit/content/child-and-adolescent-self-harm-europe-study_en">http://ec.europa.eu/justice/grants/results/daphne-toolkit/content/child-and-adolescent-self-harm-europe-study_en</a> | No  | Empirical study        |
| 76 | Nonsuicidal self-harm<br>among community<br>adolescents:<br>understanding the<br>“whats” and “whys” of<br>self-harm              | <a href="http://www.dwmh.nhs.uk/service-users-and-carers/self-harm/">http://www.dwmh.nhs.uk/service-users-and-carers/self-harm/</a> (                                                                                                           | Yes |                        |
| 77 | Self-harm - erscb                                                                                                                | <a href="https://link.springer.com/article/10.1007/s10964-005-7262-z">https://link.springer.com/article/10.1007/s10964-005-7262-z</a>                                                                                                           | No  | Empirical study        |
| 78 | Self-harm – Avon and<br>Wiltshire Mental<br>Health Partnerships<br>NHS Trust                                                     | <a href="http://www.erscb.org.uk/professionals-and-volunteers/self-harm/">http://www.erscb.org.uk/professionals-and-volunteers/self-harm/</a>                                                                                                   | Yes |                        |
| 79 | Self-Harm - SAMH                                                                                                                 | <a href="http://www.awp.nhs.uk/advice-support/conditions/self-harm/">http://www.awp.nhs.uk/advice-support/conditions/self-harm/</a>                                                                                                             | Yes |                        |
| 80 | Using data to inform<br>suicide and self-harm<br>prevention - StatsLife                                                          | <a href="https://www.samh.org.uk/documents/UnderstandingSelfHarm.pdf">https://www.samh.org.uk/documents/UnderstandingSelfHarm.pdf</a>                                                                                                           | No  | Duplicate              |
| 81 | What is self-harm? –<br>Rape Crisis England<br>and Wales                                                                         | <a href="https://www.statslife.org.uk/events/event-detail/1346/-/using-data-to-inform-suicide-and-self-harm-prevention">https://www.statslife.org.uk/events/event-detail/1346/-/using-data-to-inform-suicide-and-self-harm-prevention</a>       | No  | Content<br>unavailable |
| 82 | Self harm: Student<br>Services: University of<br>Dundee                                                                          | <a href="https://rapecrisis.org.uk/get-help/looking-for-tools-to-help-you-cope/self-harm/what-is-self-harm/">https://rapecrisis.org.uk/get-help/looking-for-tools-to-help-you-cope/self-harm/what-is-self-harm/</a>                             | Yes |                        |
| 83 | Suicide and self-harm<br>in Britain – NatCen<br>Social Research                                                                  | <a href="https://www.dundee.ac.uk/student-services/counselling/self-help/self-harm/">https://www.dundee.ac.uk/student-services/counselling/self-help/self-harm/</a>                                                                             | Yes |                        |
| 84 | Self-harm and suicide<br>prevention frameworks<br>– National Suicide<br>Prevention Alliance                                      | <a href="http://natcen.ac.uk/our-research/research/suicide-and-self-harm-in-britain-researching-risk-and-resilience/">http://natcen.ac.uk/our-research/research/suicide-and-self-harm-in-britain-researching-risk-and-resilience/</a>           | Yes |                        |
| 85 |                                                                                                                                  | <a href="https://www.nspa.org.uk/resources/self-harm-and-suicide-prevention-frameworks/">https://www.nspa.org.uk/resources/self-harm-and-suicide-prevention-frameworks/</a>                                                                     | No  | Duplicate              |

|     |                                                                           |                                                                                                                                                                                                                                                   |     |                 |
|-----|---------------------------------------------------------------------------|---------------------------------------------------------------------------------------------------------------------------------------------------------------------------------------------------------------------------------------------------|-----|-----------------|
| 86  | Health and wellbeing self-harm                                            | <a href="http://www.nwbh.nhs.uk/healthandwellbeing/Pages/Self-harm.aspx">http://www.nwbh.nhs.uk/healthandwellbeing/Pages/Self-harm.aspx</a>                                                                                                       | Yes |                 |
| 87  | Self-harm - CAMHS                                                         | <a href="https://www.camhsnorthderbyshire.nhs.uk/self-harm">https://www.camhsnorthderbyshire.nhs.uk/self-harm</a>                                                                                                                                 | Yes |                 |
| 88  | About Self Harm – Coventry and Warwickshire Mind Self-harm Masterclass    | <a href="https://cwmind.org.uk/about-self-harm/">https://cwmind.org.uk/about-self-harm/</a>                                                                                                                                                       | Yes |                 |
| 89  | 'Therapeutic Assessment for adolescents with self-harm'                   | <a href="https://www.acamh.org/event/self-harm-0619/">https://www.acamh.org/event/self-harm-0619/</a>                                                                                                                                             | Yes |                 |
| 90  | Self harm – The Tavistock and Portman NHS Foundation Trust                | <a href="https://tavistockandportman.nhs.uk/care-and-treatment/conditions/self-harm/">https://tavistockandportman.nhs.uk/care-and-treatment/conditions/self-harm/</a>                                                                             | Yes |                 |
| 91  | Self-Injury Outreach and Support                                          | <a href="http://sioutreach.org/">http://sioutreach.org/</a>                                                                                                                                                                                       | No  | Outside UK      |
| 92  | Instagram to ban all graphic self-harm images from platform               | <a href="https://www.telegraph.co.uk/news/2019/02/07/instagram-ban-graphic-self-harm-images-platform/">https://www.telegraph.co.uk/news/2019/02/07/instagram-ban-graphic-self-harm-images-platform/</a>                                           | Yes |                 |
| 93  | Self Harm – The Corner Dundee – Health and Info for Young People          | <a href="https://www.thecorner.co.uk/88_SelfHarm.html">https://www.thecorner.co.uk/88_SelfHarm.html</a>                                                                                                                                           | Yes |                 |
| 94  | A History of Self-Harm in Britain – A Genealogy of Cutting and Overdosing | <a href="https://www.palgrave.com/gp/book/9781137529619">https://www.palgrave.com/gp/book/9781137529619</a>                                                                                                                                       | No  | Empirical study |
| 95  | Self-Injury – Instagram Help Centre                                       | <a href="https://help.instagram.com/553490068054878">https://help.instagram.com/553490068054878</a>                                                                                                                                               | No  | Social media    |
| 96  | Self Injury Support – Sheffield Mental Health Guide                       | <a href="https://www.sheffieldmentalhealth.co.uk/support/self-injury-support/">https://www.sheffieldmentalhealth.co.uk/support/self-injury-support/</a>                                                                                           | Yes |                 |
| 97  | From self-harm to self-belief                                             | <a href="https://www.hgi.org.uk/resources/delve-our-extensive-library/resources-and-techniques/self-harm-self-belief">https://www.hgi.org.uk/resources/delve-our-extensive-library/resources-and-techniques/self-harm-self-belief</a>             | Yes |                 |
| 98  | Self-harm – The Mighty                                                    | <a href="https://themighty.com/topic/self-harm/">https://themighty.com/topic/self-harm/</a>                                                                                                                                                       | No  | Social media    |
| 99  | Self-Harm Intervention Programme (SHIP)                                   | <a href="https://www.inspirewellbeing.org/mental-health/services/self-harm-intervention-programme-ship">https://www.inspirewellbeing.org/mental-health/services/self-harm-intervention-programme-ship</a>                                         | Yes |                 |
| 100 | Young people use self-harm to share emotions                              | <a href="https://www.sv.uio.no/psi/english/research/news-and-events/news/young-people-use-self-harm-to-share-feelings.html">https://www.sv.uio.no/psi/english/research/news-and-events/news/young-people-use-self-harm-to-share-feelings.html</a> | Yes |                 |
